# Supplementary material
Source: HighWire-hosted journal article supplement (https://jitc.bmj.com/content/8/2/e000847)
Supplement: inline-supplementary-material-6 [file inline-supplementary-material-6.xlsx]

## Sheet: Day 9 upregulated genes
OP versus vehicle day 9 upregulated genes									TOP versus vehicle day 9 upregulated genes
	ID	Symbol	Description	FC	logFC	P	P (adj.)		ID	Symbol	Description	FC	logFC	P	P (adj.)
	Tigit	TigitTigit	T cell immunoreceptor with Ig and ITIM domains	4.063	2.023	7.98e-07	0.000464		Entpd1	Entpd1Entpd1	ectonucleoside triphosphate diphosphohydrolase 1	2.976	1.574	1.226e-07	9.436e-05
	Icos	IcosIcos	inducible T cell co-stimulator	4.609	2.205	1.205e-06	0.000464		Mertk	MertkMertk	c-mer proto-oncogene tyrosine kinase	2.494	1.319	5.319e-07	0.0001365
	Entpd1	Entpd1Entpd1	ectonucleoside triphosphate diphosphohydrolase 1	2.734	1.451	2.712e-06	0.0006375		Marco	MarcoMarco	macrophage receptor with collagenous structure	13.185	3.721	1.137e-06	0.0001905
	Marco	MarcoMarco	macrophage receptor with collagenous structure	12.953	3.695	4.016e-06	0.0006375		Icos	IcosIcos	inducible T cell co-stimulator	4.254	2.089	1.237e-06	0.0001905
	Mertk	MertkMertk	c-mer proto-oncogene tyrosine kinase	2.403	1.265	4.14e-06	0.0006375		Lyz2	Lyz2Lyz2	lysozyme 2	5.618	2.49	1.56e-06	0.0002002
	Cd8b1	Cd8b1Cd8b1	CD8 antigen, beta chain 1	5.932	2.569	1.226e-05	0.001551		Cd8b1	Cd8b1Cd8b1	CD8 antigen, beta chain 1	5.54	2.47	9.549e-06	0.0008169
	Klrd1	Klrd1Klrd1	killer cell lectin-like receptor, subfamily D, member 1	5.412	2.436	1.41e-05	0.001551		Trem2	Trem2Trem2	triggering receptor expressed on myeloid cells 2	4.958	2.31	1.198e-05	0.0008733
	Apoe	ApoeApoe	apolipoprotein E	4.047	2.017	3.235e-05	0.002763		Ifng	IfngIfng	interferon gamma	4.334	2.116	1.248e-05	0.0008733
	Selplg	SelplgSelplg	selectin, platelet (p-selectin) ligand	2.747	1.458	3.397e-05	0.002763		Tigit	TigitTigit	T cell immunoreceptor with Ig and ITIM domains	3.155	1.657	1.56e-05	0.001001
	Cxcr6	Cxcr6Cxcr6	chemokine (C-X-C motif) receptor 6	6.306	2.657	4.596e-05	0.002763		Itgb2	Itgb2Itgb2	integrin beta 2	2.64	1.4	1.844e-05	0.001076
	Cd80	Cd80Cd80	CD80 antigen	3.319	1.731	4.923e-05	0.002763		Cd37	Cd37Cd37	CD37 antigen	4.755	2.249	2.105e-05	0.001076
	Cd3d	Cd3dCd3d	CD3 antigen, delta polypeptide	4.301	2.105	4.953e-05	0.002763		Cd38	Cd38Cd38	CD38 antigen	2.249	1.169	2.164e-05	0.001076
	Cdkn1a	Cdkn1aCdkn1a	cyclin-dependent kinase inhibitor 1A (P21)	2.191	1.132	6.531e-05	0.003301		Cd6	Cd6Cd6	CD6 antigen	4.37	2.128	2.459e-05	0.001076
	Abca1	Abca1Abca1	ATP-binding cassette, sub-family A (ABC1), member 1	3.839	1.941	6.86e-05	0.003301		Il12rb2	Il12rb2Il12rb2	interleukin 12 receptor, beta 2	4.059	2.021	2.524e-05	0.001076
	Cd3g	Cd3gCd3g	CD3 antigen, gamma polypeptide	5.898	2.56	7.882e-05	0.003474		Tlr8	Tlr8Tlr8	toll-like receptor 8	2.385	1.254	2.578e-05	0.001076
	Cd38	Cd38Cd38	CD38 antigen	2.199	1.137	8.12e-05	0.003474		Selplg	SelplgSelplg	selectin, platelet (p-selectin) ligand	2.614	1.386	3.277e-05	0.001262
	Cd6	Cd6Cd6	CD6 antigen	4.19	2.067	9.239e-05	0.003497		Cd22	Cd22Cd22	CD22 antigen	4.554	2.187	3.816e-05	0.001399
	Cd247	Cd247Cd247	CD247 antigen	3.203	1.679	9.725e-05	0.003497		Cd200r1	Cd200r1Cd200r1	CD200 receptor 1	3.423	1.775	4.447e-05	0.001489
	Ifng	IfngIfng	interferon gamma	3.922	1.972	9.742e-05	0.003497		Bst1	Bst1Bst1	bone marrow stromal cell antigen 1	3.904	1.965	4.696e-05	0.001489
	Trem2	Trem2Trem2	triggering receptor expressed on myeloid cells 2	4.419	2.144	9.992e-05	0.003497		Cd2	Cd2Cd2	CD2 antigen	4.088	2.032	4.83e-05	0.001489
	Ctsw	CtswCtsw	cathepsin W	4.169	2.06	0.0001091	0.003653		Cd84	Cd84Cd84	CD84 antigen	2.682	1.423	4.833e-05	0.001489
	Cd27	Cd27Cd27	CD27 antigen	2.993	1.581	0.0001331	0.00427		Il7r	Il7rIl7r	interleukin 7 receptor	5.678	2.505	6.707e-05	0.001913
	Fasl	FaslFasl	Fas ligand (TNF superfamily, member 6)	3.613	1.853	0.0001523	0.004629		Apoe	ApoeApoe	apolipoprotein E	3.52	1.815	7.552e-05	0.002074
	Il12rb2	Il12rb2Il12rb2	interleukin 12 receptor, beta 2	3.71	1.891	0.0001629	0.004629		Ccl6	Ccl6Ccl6	chemokine (C-C motif) ligand 6	5.574	2.479	8.153e-05	0.002074
	Pdcd1	Pdcd1Pdcd1	programmed cell death 1	8.809	3.139	0.0001683	0.004629		Klrd1	Klrd1Klrd1	killer cell lectin-like receptor, subfamily D, member 1	4.229	2.08	8.197e-05	0.002074
	Amica1	JamlJaml	junction adhesion molecule like	2.504	1.324	0.0002476	0.006356		Ctsw	CtswCtsw	cathepsin W	3.97	1.989	8.35e-05	0.002074
	Cma1	Cma1Cma1	chymase 1, mast cell	6.745	2.754	0.0002845	0.007066		C3	C3C3	complement component 3	5.172	2.371	0.0001081	0.002576
	Cd3e	Cd3eCd3e	CD3 antigen, epsilon polypeptide	4.656	2.219	0.0003292	0.007681		Fasl	FaslFasl	Fas ligand (TNF superfamily, member 6)	3.476	1.797	0.0001104	0.002576
	Cd37	Cd37Cd37	CD37 antigen	3.912	1.968	0.000352	0.007973		Prf1	Prf1Prf1	perforin 1 (pore forming protein)	6.167	2.625	0.0001463	0.003313
	Cd22	Cd22Cd22	CD22 antigen	3.928	1.974	0.0003703	0.008146		Cxcr6	Cxcr6Cxcr6	chemokine (C-X-C motif) receptor 6	4.95	2.307	0.0001751	0.003852
	Il21r	Il21rIl21r	interleukin 21 receptor	2.125	1.088	0.0003927	0.008399		Abca1	Abca1Abca1	ATP-binding cassette, sub-family A (ABC1), member 1	3.267	1.708	0.0002064	0.004414
	Itk	ItkItk	IL2 inducible T cell kinase	2.977	1.574	0.0004068	0.008466		Ido1	Ido1Ido1	indoleamine 2,3-dioxygenase 1	4.026	2.009	0.0002786	0.005567
	Tlr8	Tlr8Tlr8	toll-like receptor 8	2.134	1.093	0.0004263	0.008637		Thy1	Thy1Thy1	thymus cell antigen 1, theta	3.364	1.75	0.0003263	0.005567
	Havcr2	Havcr2Havcr2	hepatitis A virus cellular receptor 2	1.997	0.998	0.000458	0.009043		Itk	ItkItk	IL2 inducible T cell kinase	2.864	1.518	0.0003282	0.005567
	Ido1	Ido1Ido1	indoleamine 2,3-dioxygenase 1	4.084	2.03	0.0004801	0.009243		Cd8a	Cd8aCd8a	CD8 antigen, alpha chain	4.528	2.179	0.0003372	0.005567
	Abcg1	Abcg1Abcg1	ATP-binding cassette, sub-family G (WHITE), member 1	4.613	2.206	0.0005114	0.009335		Lck	LckLck	lymphocyte protein tyrosine kinase	3.022	1.595	0.0003421	0.005567
	Cd8a	Cd8aCd8a	CD8 antigen, alpha chain	4.661	2.22	0.0005161	0.009335		Pdcd1	Pdcd1Pdcd1	programmed cell death 1	7.08	2.824	0.0003456	0.005567
	Slamf7	Slamf7Slamf7	SLAM family member 7	2.44	1.287	0.0005334	0.009335		Havcr2	Havcr2Havcr2	hepatitis A virus cellular receptor 2	1.956	0.968	0.000346	0.005567
	Thy1	Thy1Thy1	thymus cell antigen 1, theta	3.406	1.768	0.0005562	0.009518		Cd80	Cd80Cd80	CD80 antigen	2.699	1.432	0.0003557	0.005589
	Il18r1	Il18r1Il18r1	interleukin 18 receptor 1	4.178	2.063	0.0005846	0.009786		Amica1	JamlJaml	junction adhesion molecule like	2.321	1.215	0.0003842	0.005817
	Ltb	LtbLtb	lymphotoxin B	3.273	1.711	0.0006124	0.01003		Sh2d1a	Sh2d1aSh2d1a	SH2 domain containing 1A	2.932	1.552	0.0004089	0.006016
	Gzmb	GzmbGzmb	granzyme B	4.108	2.038	0.0006918	0.0111		Cdkn1a	Cdkn1aCdkn1a	cyclin-dependent kinase inhibitor 1A (P21)	1.92	0.941	0.0004172	0.006016
	Sh2d1a	Sh2d1aSh2d1a	SH2 domain containing 1A	2.91	1.541	0.0008387	0.01318		Abcg1	Abcg1Abcg1	ATP-binding cassette, sub-family G (WHITE), member 1	4.353	2.122	0.0004297	0.006016
	Prf1	Prf1Prf1	perforin 1 (pore forming protein)	5.147	2.364	0.001069	0.01614		Cd68	Cd68Cd68	CD68 antigen	2.144	1.1	0.0004417	0.006074
	Il7r	Il7rIl7r	interleukin 7 receptor	4.398	2.137	0.001098	0.01627		Cd3d	Cd3dCd3d	CD3 antigen, delta polypeptide	3.232	1.692	0.000513	0.00693
	Stat4	Stat4Stat4	signal transducer and activator of transcription 4	2.378	1.25	0.001222	0.01775		Txk	TxkTxk	TXK tyrosine kinase	2.41	1.269	0.0005312	0.006935
	Slc11a1	Slc11a1Slc11a1	solute carrier family 11 (proton-coupled divalent metal ion transporters), member 1	2.136	1.095	0.001477	0.02021		Ctsh	CtshCtsh	cathepsin H	1.679	0.748	0.0005479	0.006935
	Lyz2	Lyz2Lyz2	lysozyme 2	3.207	1.681	0.001524	0.02021		Il21r	Il21rIl21r	interleukin 21 receptor	2.003	1.002	0.0005662	0.007031
	Lck	LckLck	lymphocyte protein tyrosine kinase	2.787	1.479	0.001532	0.02021		Cd3g	Cd3gCd3g	CD3 antigen, gamma polypeptide	4.277	2.097	0.0005868	0.007063
	Lag3	Lag3Lag3	lymphocyte-activation gene 3	4.028	2.01	0.001552	0.02021		Pdcd1lg2	Pdcd1lg2Pdcd1lg2	programmed cell death 1 ligand 2	4.834	2.273	0.0006335	0.007505
	Fcer1a	Fcer1aFcer1a	Fc receptor, IgE, high affinity I, alpha polypeptide	2.703	1.435	0.001575	0.02021		Tnfsf11	Tnfsf11Tnfsf11	tumor necrosis factor (ligand) superfamily, member 11	2.166	1.115	0.0006565	0.007545
	C3	C3C3	complement component 3	4.031	2.011	0.00162	0.02045		Ccl8	Ccl8Ccl8	chemokine (C-C motif) ligand 8	3.262	1.706	0.0007816	0.008598
	Txnip	TxnipTxnip	thioredoxin interacting protein	1.733	0.793	0.001743	0.02113		Zap70	Zap70Zap70	zeta-chain (TCR) associated protein kinase	4.166	2.059	0.0008262	0.008836
	Zap70	Zap70Zap70	zeta-chain (TCR) associated protein kinase	4.067	2.024	0.001756	0.02113		Lgals3	Lgals3Lgals3	lectin, galactose binding, soluble 3	1.839	0.879	0.0009575	0.0101
	Cd68	Cd68Cd68	CD68 antigen	2.031	1.022	0.001831	0.02169		Gzmb	GzmbGzmb	granzyme B	3.624	1.858	0.001093	0.01122
	Cd2	Cd2Cd2	CD2 antigen	3.034	1.601	0.002023	0.02324		Cd3e	Cd3eCd3e	CD3 antigen, epsilon polypeptide	3.703	1.889	0.001197	0.01182
	Cd84	Cd84Cd84	CD84 antigen	2.122	1.086	0.00278	0.02978		Hcst	HcstHcst	hematopoietic cell signal transducer	5.386	2.429	0.001294	0.0123
	Itgb2	Itgb2Itgb2	integrin beta 2	2.007	1.005	0.002874	0.03031		Cd97	Adgre5Adgre5	adhesion G protein-coupled receptor E5	2.337	1.225	0.001335	0.01238
	Cd5	Cd5Cd5	CD5 antigen	2.443	1.289	0.003142	0.03225		C2	C2C2	complement component 2 (within H-2S)	4.076	2.027	0.001554	0.01408
	Il2rb	Il2rbIl2rb	interleukin 2 receptor, beta chain	4.045	2.016	0.00384	0.03791		Serping1	Serping1Serping1	serine (or cysteine) peptidase inhibitor, clade G, member 1	4.478	2.163	0.001625	0.01422
	Gzmk	GzmkGzmk	granzyme K	3.462	1.791	0.003951	0.03803		Eomes	EomesEomes	eomesodermin	1.791	0.841	0.00165	0.01427
	Bst1	Bst1Bst1	bone marrow stromal cell antigen 1	2.663	1.413	0.004629	0.04243		Tnfsf14	Tnfsf14Tnfsf14	tumor necrosis factor (ligand) superfamily, member 14	2.498	1.321	0.001841	0.01575
	Hcst	HcstHcst	hematopoietic cell signal transducer	4.568	2.192	0.005597	0.05012		Gzmk	GzmkGzmk	granzyme K	3.561	1.832	0.001948	0.01649
	Ctla4	Ctla4Ctla4	cytotoxic T-lymphocyte-associated protein 4	2.321	1.215	0.005706	0.0505		Cd274	Cd274Cd274	CD274 antigen	2.637	1.399	0.002073	0.01716
	Txk	TxkTxk	TXK tyrosine kinase	2.077	1.055	0.005817	0.0509		H2-T23	H2-T23H2-T23	histocompatibility 2, T region locus 23	1.804	0.851	0.002437	0.01975
	Ccl8	Ccl8Ccl8	chemokine (C-C motif) ligand 8	2.71	1.438	0.006695	0.05665		Cd247	Cd247Cd247	CD247 antigen	2.311	1.208	0.002717	0.02135
	C2	C2C2	complement component 2 (within H-2S)	3.47	1.795	0.00746	0.06177		Rora	RoraRora	RAR-related orphan receptor alpha	2.843	1.508	0.002823	0.0219
	Nfatc2	Nfatc2Nfatc2	nuclear factor of activated T cells, cytoplasmic, calcineurin dependent 2	1.762	0.817	0.00793	0.06429		Ltb	LtbLtb	lymphotoxin B	2.643	1.402	0.002886	0.0219
	Cd274	Cd274Cd274	CD274 antigen	2.402	1.264	0.007932	0.06429		Cd27	Cd27Cd27	CD27 antigen	2.218	1.149	0.003025	0.02218
	Fcgr4	Fcgr4Fcgr4	Fc receptor, IgG, low affinity IV	2.643	1.402	0.008188	0.065		Ccl11	Ccl11Ccl11	chemokine (C-C motif) ligand 11	6.279	2.651	0.003079	0.02236
	Ccl1	Ccl1Ccl1	chemokine (C-C motif) ligand 1	2.261	1.177	0.008799	0.06757		Il2rb	Il2rbIl2rb	interleukin 2 receptor, beta chain	3.825	1.936	0.003451	0.02438
	Cd1d1	Cd1d1Cd1d1	CD1d1 antigen	2.198	1.136	0.009386	0.07062		Lag3	Lag3Lag3	lymphocyte-activation gene 3	3.362	1.749	0.003576	0.02503
	Slamf1	Slamf1Slamf1	signaling lymphocytic activation molecule family member 1	2.049	1.035	0.01137	0.08173		Itga4	Itga4Itga4	integrin alpha 4	2.238	1.162	0.003718	0.02529
	Cd97	Adgre5Adgre5	adhesion G protein-coupled receptor E5	2	1	0.01216	0.08362		Dpp4	Dpp4Dpp4	dipeptidylpeptidase 4	3.216	1.685	0.003861	0.02563
	Il16	Il16Il16	interleukin 16	1.884	0.914	0.0126	0.08369		Ccl17	Ccl17Ccl17	chemokine (C-C motif) ligand 17	2.964	1.568	0.004164	0.02741
	H2-T23	H2-T23H2-T23	histocompatibility 2, T region locus 23	1.662	0.733	0.01267	0.08369		Il18r1	Il18r1Il18r1	interleukin 18 receptor 1	3.052	1.61	0.004344	0.02811
	Ly9	Ly9Ly9	lymphocyte antigen 9	2.048	1.034	0.01346	0.08625		Smpd3	Smpd3Smpd3	sphingomyelin phosphodiesterase 3, neutral	4.662	2.221	0.004603	0.02936
	Ctsh	CtshCtsh	cathepsin H	1.47	0.556	0.01355	0.08625		Slamf1	Slamf1Slamf1	signaling lymphocytic activation molecule family member 1	2.144	1.101	0.004695	0.02963
	Ccr8	Ccr8Ccr8	chemokine (C-C motif) receptor 8	1.796	0.845	0.01413	0.08915		Cma1	Cma1Cma1	chymase 1, mast cell	3.944	1.98	0.005365	0.03278
	Rorc	RorcRorc	RAR-related orphan receptor gamma	2.468	1.303	0.01465	0.09169		Cfh	CfhCfh	complement component factor h	3.829	1.937	0.005468	0.03289
	Lgals3	Lgals3Lgals3	lectin, galactose binding, soluble 3	1.598	0.676	0.01477	0.09169		Ccl9	Ccl9Ccl9	chemokine (C-C motif) ligand 9	3.903	1.965	0.006013	0.03384
	Tnfsf10	Tnfsf10Tnfsf10	tumor necrosis factor (ligand) superfamily, member 10	1.727	0.788	0.0149	0.09175		Irgm2	Irgm2Irgm2	immunity-related GTPase family M member 2	1.784	0.835	0.006283	0.03506
	Bax	BaxBax	BCL2-associated X protein	1.373	0.457	0.01621	0.09673		Ccl19	Ccl19Ccl19	chemokine (C-C motif) ligand 19	4.109	2.039	0.006548	0.03602
	Cd200r1	Cd200r1Cd200r1	CD200 receptor 1	2.087	1.061	0.01756	0.1025		Tnfrsf18	Tnfrsf18Tnfrsf18	tumor necrosis factor receptor superfamily, member 18	2.527	1.337	0.007196	0.03853
	Syk	SykSyk	spleen tyrosine kinase	1.876	0.907	0.01757	0.1025		Cyfip2	Cyfip2Cyfip2	cytoplasmic FMR1 interacting protein 2	1.921	0.942	0.007197	0.03853
	Klrc1	Klrc1Klrc1	killer cell lectin-like receptor subfamily C, member 1	3.116	1.64	0.01781	0.1031		Slc11a1	Slc11a1Slc11a1	solute carrier family 11 (proton-coupled divalent metal ion transporters), member 1	1.823	0.866	0.007607	0.03931
	Serping1	Serping1Serping1	serine (or cysteine) peptidase inhibitor, clade G, member 1	3.214	1.684	0.0187	0.1064		Slamf7	Slamf7Slamf7	SLAM family member 7	1.902	0.927	0.007799	0.04003
	Tnfsf11	Tnfsf11Tnfsf11	tumor necrosis factor (ligand) superfamily, member 11	1.74	0.799	0.01881	0.1064		Ly9	Ly9Ly9	lymphocyte antigen 9	2.055	1.039	0.008981	0.04461
	Eomes	EomesEomes	eomesodermin	1.569	0.65	0.01974	0.1082		Arg1	Arg1Arg1	arginase, liver	4.209	2.073	0.009748	0.04717
	Cfd	CfdCfd	complement factor D (adipsin)	18.997	4.248	0.01989	0.1082		Nfatc2	Nfatc2Nfatc2	nuclear factor of activated T cells, cytoplasmic, calcineurin dependent 2	1.685	0.753	0.009848	0.04717
	Ccl5	Ccl5Ccl5	chemokine (C-C motif) ligand 5	2.131	1.091	0.01995	0.1082		Chil3	Chil3Chil3	chitinase-like 3	4.262	2.092	0.009863	0.04717
	Irf4	Irf4Irf4	interferon regulatory factor 4	2.215	1.147	0.02108	0.1132		Clec7a	Clec7aClec7a	C-type lectin domain family 7, member a	2.026	1.019	0.01249	0.05818
	C1qa	C1qaC1qa	complement component 1, q subcomponent, alpha polypeptide	1.542	0.625	0.02116	0.1132		Cd1d1	Cd1d1Cd1d1	CD1d1 antigen	2.048	1.035	0.01254	0.05818
	Irgm2	Irgm2Irgm2	immunity-related GTPase family M member 2	1.652	0.724	0.02384	0.1233		Cd36	Cd36Cd36	CD36 antigen	4.681	2.227	0.01392	0.06349
	Tnfsf14	Tnfsf14Tnfsf14	tumor necrosis factor (ligand) superfamily, member 14	1.996	0.997	0.02414	0.1233		Ikbke	IkbkeIkbke	inhibitor of kappaB kinase epsilon	2.208	1.143	0.01539	0.06813
	Cd36	Cd36Cd36	CD36 antigen	4.43	2.147	0.02414	0.1233		Btk	BtkBtk	Bruton agammaglobulinemia tyrosine kinase	1.526	0.61	0.01585	0.06973
	Rora	RoraRora	RAR-related orphan receptor alpha	2.251	1.171	0.02642	0.1287		Cd48	Cd48Cd48	CD48 antigen	1.704	0.769	0.01622	0.07056
	Klrk1	Klrk1Klrk1	killer cell lectin-like receptor subfamily K, member 1	2.407	1.268	0.02663	0.129		C4b	C4bC4b	complement component 4B (Chido blood group)	3.075	1.621	0.01631	0.07056
	Cyfip2	Cyfip2Cyfip2	cytoplasmic FMR1 interacting protein 2	1.751	0.808	0.0279	0.1316		Il5ra	Il5raIl5ra	interleukin 5 receptor, alpha	1.887	0.916	0.01642	0.07065
	Itga4	Itga4Itga4	integrin alpha 4	1.892	0.92	0.02802	0.1316		Gfi1	Gfi1Gfi1	growth factor independent 1	2.036	1.026	0.01848	0.076
	Tnfrsf11a	Tnfrsf11aTnfrsf11a	tumor necrosis factor receptor superfamily, member 11a, NFKB activator	1.502	0.587	0.02872	0.134		Clec4n	Clec4nClec4n	C-type lectin domain family 4, member n	1.817	0.861	0.01903	0.07711
	Dpp4	Dpp4Dpp4	dipeptidylpeptidase 4	2.479	1.31	0.0317	0.1404		Stat4	Stat4Stat4	signal transducer and activator of transcription 4	1.797	0.846	0.01965	0.0777
	Ccr5	Ccr5Ccr5	chemokine (C-C motif) receptor 5	1.499	0.584	0.03452	0.1502		Irf4	Irf4Irf4	interferon regulatory factor 4	2.14	1.097	0.02007	0.0777
	Cd28	Cd28Cd28	CD28 antigen	1.694	0.76	0.03471	0.1502		Mill2	Mill2Mill2	MHC I like leukocyte 2	2.252	1.171	0.02008	0.0777
	Card11	Card11Card11	caspase recruitment domain family, member 11	2.267	1.181	0.0357	0.1527		Cd5	Cd5Cd5	CD5 antigen	1.935	0.953	0.02042	0.07822
	Cxcl13	Cxcl13Cxcl13	chemokine (C-X-C motif) ligand 13	3.568	1.835	0.03671	0.1553		Ccl5	Ccl5Ccl5	chemokine (C-C motif) ligand 5	2.041	1.029	0.02065	0.0783
	Cd48	Cd48Cd48	CD48 antigen	1.623	0.699	0.03771	0.1573		Tlr5	Tlr5Tlr5	toll-like receptor 5	1.81	0.856	0.02297	0.08303
	Smpd3	Smpd3Smpd3	sphingomyelin phosphodiesterase 3, neutral	3.25	1.701	0.03793	0.1573		Bax	BaxBax	BCL2-associated X protein	1.327	0.409	0.02323	0.0836
	Pdcd1lg2	Pdcd1lg2Pdcd1lg2	programmed cell death 1 ligand 2	2.681	1.423	0.03913	0.1588		Thbs1	Thbs1Thbs1	thrombospondin 1	2.327	1.219	0.02463	0.08681
	Batf	BatfBatf	basic leucine zipper transcription factor, ATF-like	1.529	0.612	0.04223	0.1627		Hsd11b1	Hsd11b1Hsd11b1	hydroxysteroid 11-beta dehydrogenase 1	2.799	1.485	0.02469	0.08681
	Ccl4	Ccl4Ccl4	chemokine (C-C motif) ligand 4	2.391	1.258	0.04226	0.1627		Ptprc	PtprcPtprc	protein tyrosine phosphatase, receptor type, C	1.669	0.739	0.02794	0.09436
	Csf3r	Csf3rCsf3r	colony stimulating factor 3 receptor (granulocyte)	2.343	1.228	0.0448	0.1693		Il4ra	Il4raIl4ra	interleukin 4 receptor, alpha	1.804	0.851	0.02946	0.09863
	Klrc2	Klrc2Klrc2	killer cell lectin-like receptor subfamily C, member 2	2.698	1.432	0.04611	0.1723		Ticam2	Ticam2Ticam2	toll-like receptor adaptor molecule 2	1.74	0.799	0.0296	0.09865
									Tek	TekTek	endothelial-specific receptor tyrosine kinase	2.616	1.388	0.0303	0.1006
									Txnip	TxnipTxnip	thioredoxin interacting protein	1.428	0.514	0.03049	0.1008
									Bcl2l1	Bcl2l1Bcl2l1	BCL2-like 1	1.317	0.397	0.03237	0.1061
									Ctla4	Ctla4Ctla4	cytotoxic T-lymphocyte-associated protein 4	1.844	0.883	0.03294	0.1067
									Fos	FosFos	FBJ osteosarcoma oncogene	1.876	0.907	0.03299	0.1067
									Cfp	CfpCfp	complement factor properdin	2.154	1.107	0.03324	0.1069
									Pik3cd	Pik3cdPik3cd	phosphatidylinositol 3-kinase catalytic delta polypeptide	1.619	0.695	0.03399	0.1077
									Mpo	MpoMpo	myeloperoxidase	1.727	0.788	0.03416	0.1078
									Il11ra1	Il11ra1Il11ra1	interleukin 11 receptor, alpha chain 1	2.436	1.285	0.03444	0.1079
									Fcgr4	Fcgr4Fcgr4	Fc receptor, IgG, low affinity IV	2.074	1.053	0.0353	0.1092
									Cmklr1	Cmklr1Cmklr1	chemokine-like receptor 1	1.448	0.534	0.03578	0.1102
									Fut7	Fut7Fut7	fucosyltransferase 7	1.906	0.93	0.04103	0.1234
									Tbx21	Tbx21Tbx21	T-box 21	1.702	0.767	0.04317	0.1267
									CD209e	Cd209eCd209e	CD209e antigen	1.856	0.892	0.04366	0.1273
									Slamf6	Slamf6Slamf6	SLAM family member 6	1.522	0.606	0.04615	0.1336
									Ccr5	Ccr5Ccr5	chemokine (C-C motif) receptor 5	1.433	0.519	0.04747	0.1361
									Lrp1	Lrp1Lrp1	low density lipoprotein receptor-related protein 1	1.66	0.731	0.04828	0.1372

## Sheet: Day 9 downregulated genes
	OP versus vehicle day 9 downregulated genes								TOP versus vehicle day 9 downregulated genes
	ID	Symbol	Description	FC	logFC	P.Value	adj.P.Val		ID	Symbol	Description	FC	logFC	P.Value	adj.P.Val
	Mapk8	Mapk8Mapk8	mitogen-activated protein kinase 8	-1.839	-0.879	5.009e-05	0.002763		Vegfa	VegfaVegfa	vascular endothelial growth factor A	-5.419	-2.438	3.642e-07	0.0001365
	Vegfa	VegfaVegfa	vascular endothelial growth factor A	-4.012	-2.004	5.023e-05	0.002763		Edc3	Edc3Edc3	enhancer of mRNA decapping 3	-1.925	-0.945	5.38e-06	0.0005834
	Nefl	NeflNefl	neurofilament, light polypeptide	-3.9	-1.964	0.0001659	0.004629		Mapk8	Mapk8Mapk8	mitogen-activated protein kinase 8	-1.918	-0.939	6.062e-06	0.0005834
	Itga1	Itga1Itga1	integrin alpha 1	-3.208	-1.682	0.0001753	0.004654		Dusp4	Dusp4Dusp4	dual specificity phosphatase 4	-5.744	-2.522	2.656e-05	0.001076
	Kit	KitKit	KIT proto-oncogene receptor tyrosine kinase	-4.3	-2.104	0.0003058	0.007358		Smad3	Smad3Smad3	SMAD family member 3	-2.377	-1.249	5.06e-05	0.001498
	Pdgfrb	PdgfrbPdgfrb	platelet derived growth factor receptor, beta polypeptide	-2.737	-1.453	0.0005304	0.009335		Il12b	Il12bIl12b	interleukin 12b	-3.375	-1.755	0.0002445	0.005088
	Mpped1	Mpped1Mpped1	metallophosphoesterase domain containing 1	-2.763	-1.466	0.001015	0.01563		Itga1	Itga1Itga1	integrin alpha 1	-2.904	-1.538	0.0002884	0.005567
	Edc3	Edc3Edc3	enhancer of mRNA decapping 3	-1.603	-0.681	0.001443	0.02021		Isg20	Isg20Isg20	interferon-stimulated protein	-2.327	-1.219	0.0003091	0.005567
	Lif	LifLif	leukemia inhibitory factor	-2.286	-1.193	0.00155	0.02021		Smad4	Smad4Smad4	SMAD family member 4	-2.037	-1.026	0.0003189	0.005567
	Slc7a11	Slc7a11Slc7a11	solute carrier family 7 (cationic amino acid transporter, y+ system), member 11	-2.805	-1.488	0.001721	0.02113		Fez1	Fez1Fez1	fasciculation and elongation protein zeta 1 (zygin I)	-2.221	-1.151	0.000347	0.005567
	Ifna4	Ifna4Ifna4	interferon alpha 4	-2.118	-1.083	0.00193	0.02252		Pvrl2	Nectin2Nectin2	nectin cell adhesion molecule 2	-1.926	-0.946	0.0003853	0.005817
	Hras	HrasHras	Harvey rat sarcoma virus oncogene	-2.398	-1.262	0.002235	0.0253		Tgfb2	Tgfb2Tgfb2	transforming growth factor, beta 2	-3.612	-1.853	0.0004263	0.006016
	Egr3	Egr3Egr3	early growth response 3	-1.906	-0.931	0.002349	0.02622		Map2k1	Map2k1Map2k1	mitogen-activated protein kinase kinase 1	-2.041	-1.029	0.0005342	0.006935
	Ifna1	Ifna1Ifna1	interferon alpha 1	-2.381	-1.251	0.002488	0.02737		Cx3cr1	Cx3cr1Cx3cr1	chemokine (C-X3-C motif) receptor 1	-3.701	-1.888	0.0005494	0.006935
	Fadd	FaddFadd	Fas (TNFRSF6)-associated via death domain	-1.749	-0.807	0.002785	0.02978		Ecsit	EcsitEcsit	ECSIT signalling integrator	-1.843	-0.882	0.0005871	0.007063
	Gpr44	Ptgdr2Ptgdr2	prostaglandin D2 receptor 2	-2.282	-1.19	0.00304	0.03163		Cxcr4	Cxcr4Cxcr4	chemokine (C-X-C motif) receptor 4	-2.235	-1.16	0.0006525	0.007545
	Pvrl2	Nectin2Nectin2	nectin cell adhesion molecule 2	-1.751	-0.808	0.003661	0.03709		Egr3	Egr3Egr3	early growth response 3	-1.976	-0.983	0.0007522	0.008518
	Cd44	Cd44Cd44	CD44 antigen	-2.112	-1.079	0.003728	0.03728		Pdgfrb	PdgfrbPdgfrb	platelet derived growth factor receptor, beta polypeptide	-2.522	-1.335	0.0007755	0.008598
	Il9	Il9Il9	interleukin 9	-2.421	-1.275	0.00393	0.03803		Clu	CluClu	clusterin	-4.255	-2.089	0.0008194	0.008836
	Il1r1	Il1r1Il1r1	interleukin 1 receptor, type I	-2.559	-1.356	0.004061	0.03835		Ncam1	Ncam1Ncam1	neural cell adhesion molecule 1	-2.81	-1.491	0.001059	0.01102
	Itgb1	Itgb1Itgb1	integrin beta 1 (fibronectin receptor beta)	-1.771	-0.824	0.004116	0.03835		Pvr	PvrPvr	poliovirus receptor	-2.276	-1.186	0.001138	0.01153
	Colec12	Colec12Colec12	collectin sub-family member 12	-2.069	-1.049	0.004134	0.03835		Lif	LifLif	leukemia inhibitory factor	-2.235	-1.161	0.001188	0.01182
	Cxcr1	Cxcr1Cxcr1	chemokine (C-X-C motif) receptor 1	-2.741	-1.455	0.005443	0.04931		Sdha	SdhaSdha	succinate dehydrogenase complex, subunit A, flavoprotein (Fp)	-2.528	-1.338	0.00123	0.01185
	Ecsit	EcsitEcsit	ECSIT signalling integrator	-1.665	-0.736	0.006016	0.05205		Tgfbr1	Tgfbr1Tgfbr1	transforming growth factor, beta receptor I	-1.584	-0.663	0.001231	0.01185
	Klra20	Klra20Klra20	killer cell lectin-like receptor subfamily A, member 20	-2.35	-1.233	0.006347	0.0543		Hmgb1	Hmgb1Hmgb1	high mobility group box 1	-2.26	-1.177	0.001332	0.01238
	Xcr1	Xcr1Xcr1	chemokine (C motif) receptor 1	-2.895	-1.534	0.00728	0.06093		Traf2	Traf2Traf2	TNF receptor-associated factor 2	-1.762	-0.817	0.001492	0.01368
	Pvr	PvrPvr	poliovirus receptor	-2.014	-1.01	0.008063	0.06467		Tfrc	TfrcTfrc	transferrin receptor	-2.261	-1.177	0.001581	0.01411
	Il5	Il5Il5	interleukin 5	-2.085	-1.06	0.008616	0.06757		Itgb1	Itgb1Itgb1	integrin beta 1 (fibronectin receptor beta)	-1.82	-0.864	0.001595	0.01411
	Map2k1	Map2k1Map2k1	mitogen-activated protein kinase kinase 1	-1.756	-0.812	0.008723	0.06757		Gpi1	Gpi1Gpi1	glucose phosphate isomerase 1	-2.217	-1.148	0.002033	0.01702
	C1qbp	C1qbpC1qbp	complement component 1, q subcomponent binding protein	-1.979	-0.985	0.008863	0.06757		Reps1	Reps1Reps1	RalBP1 associated Eps domain containing protein	-1.678	-0.747	0.002148	0.01759
	Il12a	Il12aIl12a	interleukin 12a	-2.288	-1.194	0.009446	0.07062		Cd44	Cd44Cd44	CD44 antigen	-2.092	-1.065	0.002587	0.02075
	C8a	C8aC8a	complement component 8, alpha polypeptide	-2.302	-1.203	0.009844	0.07289		Myc	MycMyc	myelocytomatosis oncogene	-2.293	-1.197	0.002713	0.02135
	Tgfb2	Tgfb2Tgfb2	transforming growth factor, beta 2	-2.646	-1.404	0.01029	0.0755		Ubc	UbcUbc	ubiquitin C	-1.329	-0.41	0.002867	0.0219
	Tnfrsf13c	Tnfrsf13cTnfrsf13c	tumor necrosis factor receptor superfamily, member 13c	-2.267	-1.181	0.01044	0.07583		Yy1	Yy1Yy1	YY1 transcription factor	-1.614	-0.69	0.002901	0.0219
	Il1b	Il1bIl1b	interleukin 1 beta	-5.878	-2.555	0.01146	0.08173		Myd88	Myd88Myd88	myeloid differentiation primary response gene 88	-1.87	-0.903	0.002966	0.02205
	Tfrc	TfrcTfrc	transferrin receptor	-1.972	-0.98	0.01188	0.08362		Stat3	Stat3Stat3	signal transducer and activator of transcription 3	-1.558	-0.64	0.002978	0.02205
	Il22ra2	Il22ra2Il22ra2	interleukin 22 receptor, alpha 2	-2.051	-1.037	0.01201	0.08362		Ppia	PpiaPpia	peptidylprolyl isomerase A	-1.844	-0.883	0.003127	0.02251
	Il13ra1	Il13ra1Il13ra1	interleukin 13 receptor, alpha 1	-1.402	-0.487	0.01217	0.08362		Notch1	Notch1Notch1	notch 1	-1.772	-0.826	0.003398	0.02422
	Stat3	Stat3Stat3	signal transducer and activator of transcription 3	-1.48	-0.565	0.01227	0.08362		Runx1	Runx1Runx1	runt related transcription factor 1	-1.843	-0.882	0.003635	0.02504
	Irak1	Irak1Irak1	interleukin-1 receptor-associated kinase 1	-1.38	-0.464	0.01246	0.08369		Mme	MmeMme	membrane metallo endopeptidase	-2.892	-1.532	0.003641	0.02504
	Xbp1	Xbp1Xbp1	X-box binding protein 1	-1.365	-0.449	0.01272	0.08369		Bcl10	Bcl10Bcl10	B cell leukemia/lymphoma 10	-1.92	-0.941	0.003748	0.02529
	Tollip	TollipTollip	toll interacting protein	-1.317	-0.397	0.01327	0.08586		Irak1	Irak1Irak1	interleukin-1 receptor-associated kinase 1	-1.427	-0.513	0.003777	0.02529
	Smad3	Smad3Smad3	SMAD family member 3	-1.724	-0.786	0.01327	0.08586		Eef1g	Eef1gEef1g	eukaryotic translation elongation factor 1 gamma	-2.179	-1.124	0.004272	0.02788
	Fez1	Fez1Fez1	fasciculation and elongation protein zeta 1 (zygin I)	-1.749	-0.807	0.01567	0.09579		Il1b	Il1bIl1b	interleukin 1 beta	-6.617	-2.726	0.004614	0.02936
	Isg20	Isg20Isg20	interferon-stimulated protein	-1.795	-0.844	0.01597	0.09673		Rpl19	Rpl19Rpl19	ribosomal protein L19	-1.818	-0.862	0.005067	0.0316
	Sigirr	SigirrSigirr	single immunoglobulin and toll-interleukin 1 receptor (TIR) domain	-1.534	-0.617	0.01617	0.09673		Ets1	Ets1Ets1	E26 avian leukemia oncogene 1, 5' domain	-1.538	-0.621	0.005089	0.0316
	Glycam1	Glycam1Glycam1	glycosylation dependent cell adhesion molecule 1	-2.161	-1.112	0.01732	0.1025		Tab1	Tab1Tab1	TGF-beta activated kinase 1/MAP3K7 binding protein 1	-1.509	-0.594	0.00519	0.03197
	Prdm1	Prdm1Prdm1	PR domain containing 1, with ZNF domain	-2.157	-1.109	0.01872	0.1064		Syt17	Syt17Syt17	synaptotagmin XVII	-2.067	-1.048	0.005458	0.03289
	Traf2	Traf2Traf2	TNF receptor-associated factor 2	-1.548	-0.63	0.01892	0.1064		Cd276	Cd276Cd276	CD276 antigen	-2.037	-1.026	0.005748	0.03355
	Egr2	Egr2Egr2	early growth response 2	-1.83	-0.872	0.01929	0.1073		Sh2d1b1	Sh2d1b1Sh2d1b1	SH2 domain containing 1B1	-2.345	-1.23	0.005757	0.03355
	Ncam1	Ncam1Ncam1	neural cell adhesion molecule 1	-2.157	-1.109	0.01937	0.1073		Il22ra2	Il22ra2Il22ra2	interleukin 22 receptor, alpha 2	-2.12	-1.084	0.005758	0.03355
	Cd207	Cd207Cd207	CD207 antigen	-1.958	-0.97	0.02202	0.1169		Nup107	Nup107Nup107	nucleoporin 107	-2.073	-1.051	0.005784	0.03355
	Fap	FapFap	fibroblast activation protein	-2.353	-1.234	0.0235	0.1233		Cxcr1	Cxcr1Cxcr1	chemokine (C-X-C motif) receptor 1	-2.584	-1.369	0.005805	0.03355
	Tgfb3	Tgfb3Tgfb3	transforming growth factor, beta 3	-1.812	-0.858	0.02366	0.1233		Hdac3	Hdac3Hdac3	histone deacetylase 3	-1.616	-0.693	0.005839	0.03355
	Aire	AireAire	autoimmune regulator (autoimmune polyendocrinopathy candidiasis ectodermal dystrophy)	-1.869	-0.902	0.02417	0.1233		C8b	C8bC8b	complement component 8, beta polypeptide	-2.202	-1.139	0.00597	0.03384
	Cxcl1	Cxcl1Cxcl1	chemokine (C-X-C motif) ligand 1	-4.85	-2.278	0.02436	0.1234		Klra20	Klra20Klra20	killer cell lectin-like receptor subfamily A, member 20	-2.262	-1.177	0.006021	0.03384
	Tab1	Tab1Tab1	TGF-beta activated kinase 1/MAP3K7 binding protein 1	-1.413	-0.499	0.02493	0.1246		Colec12	Colec12Colec12	collectin sub-family member 12	-1.923	-0.943	0.006494	0.03597
	Masp1	Masp1Masp1	mannan-binding lectin serine peptidase 1	-1.88	-0.91	0.02534	0.1259		Mapkapk2	Mapkapk2Mapkapk2	MAP kinase-activated protein kinase 2	-1.594	-0.673	0.007033	0.03841
	Ltf	LtfLtf	lactotransferrin	-2.064	-1.045	0.02592	0.1279		C1qbp	C1qbpC1qbp	complement component 1, q subcomponent binding protein	-1.943	-0.958	0.007316	0.03853
	Hmgb1	Hmgb1Hmgb1	high mobility group box 1	-1.801	-0.849	0.02618	0.1284		Oaz1	Oaz1Oaz1	ornithine decarboxylase antizyme 1	-1.748	-0.806	0.007345	0.03853
	Tgfbr1	Tgfbr1Tgfbr1	transforming growth factor, beta receptor I	-1.388	-0.473	0.0269	0.1294		Mapk11	Mapk11Mapk11	mitogen-activated protein kinase 11	-2.083	-1.058	0.007348	0.03853
	Atf2	Atf2Atf2	activating transcription factor 2	-1.467	-0.553	0.02766	0.1316		Tollip	TollipTollip	toll interacting protein	-1.328	-0.409	0.007358	0.03853
	Sdha	SdhaSdha	succinate dehydrogenase complex, subunit A, flavoprotein (Fp)	-1.93	-0.948	0.02774	0.1316		Icosl	IcoslIcosl	icos ligand	-1.586	-0.665	0.007405	0.03853
	C8b	C8bC8b	complement component 8, beta polypeptide	-1.927	-0.946	0.02914	0.1352		Masp1	Masp1Masp1	mannan-binding lectin serine peptidase 1	-2.043	-1.031	0.007883	0.0402
	Psmd7	Psmd7Psmd7	proteasome (prosome, macropain) 26S subunit, non-ATPase, 7	-1.452	-0.538	0.02993	0.138		Mmp9	Mmp9Mmp9	matrix metallopeptidase 9	-3.628	-1.859	0.00805	0.04078
	Osm	OsmOsm	oncostatin M	-2.512	-1.329	0.03042	0.1387		Chuk	ChukChuk	conserved helix-loop-helix ubiquitous kinase	-1.427	-0.513	0.008578	0.04317
	Klra1	Klra1Klra1	killer cell lectin-like receptor, subfamily A, member 1	-2.043	-1.031	0.03059	0.1387		Lilra5	Lilra5Lilra5	leukocyte immunoglobulin-like receptor, subfamily A (with TM domain), member 5	-2.596	-1.377	0.008943	0.04461
	Ticam1	Ticam1Ticam1	toll-like receptor adaptor molecule 1	-1.382	-0.467	0.03062	0.1387		Mbl2	Mbl2Mbl2	mannose-binding lectin (protein C) 2	-2.219	-1.15	0.009088	0.04486
	Mme	MmeMme	membrane metallo endopeptidase	-2.277	-1.187	0.03111	0.1397		Fadd	FaddFadd	Fas (TNFRSF6)-associated via death domain	-1.583	-0.663	0.00928	0.04551
	Smad4	Smad4Smad4	SMAD family member 4	-1.554	-0.636	0.0312	0.1397		Jam3	Jam3Jam3	junction adhesion molecule 3	-1.883	-0.913	0.009819	0.04717
	Ppia	PpiaPpia	peptidylprolyl isomerase A	-1.591	-0.67	0.03174	0.1404		Ythdf2	Ythdf2Ythdf2	YTH domain family 2	-1.67	-0.74	0.01011	0.04803
	Angpt1	Angpt1Angpt1	angiopoietin 1	-1.576	-0.657	0.03314	0.1458		Map2k4	Map2k4Map2k4	mitogen-activated protein kinase kinase 4	-2.006	-1.004	0.01079	0.05098
	Rps6	Rps6Rps6	ribosomal protein S6	-1.433	-0.519	0.03405	0.149		Cd207	Cd207Cd207	CD207 antigen	-2.014	-1.01	0.0121	0.05679
	Dusp4	Dusp4Dusp4	dual specificity phosphatase 4	-2.453	-1.294	0.03505	0.1508		Ddx58	Ddx58Ddx58	DEAD (Asp-Glu-Ala-Asp) box polypeptide 58	-1.876	-0.907	0.01281	0.05904
	Pmch	PmchPmch	pro-melanin-concentrating hormone	-2.001	-1.001	0.03647	0.1552		Il19	Il19Il19	interleukin 19	-2.4	-1.263	0.01397	0.06349
	Gpr183	Gpr183Gpr183	G protein-coupled receptor 183	-1.719	-0.781	0.03747	0.1573		Prdm1	Prdm1Prdm1	PR domain containing 1, with ZNF domain	-2.145	-1.101	0.01402	0.06349
	Eef1g	Eef1gEef1g	eukaryotic translation elongation factor 1 gamma	-1.805	-0.852	0.03814	0.1573		Ilf3	Ilf3Ilf3	interleukin enhancer binding factor 3	-1.846	-0.884	0.0141	0.06349
	Cd63	Cd63Cd63	CD63 antigen	-1.533	-0.617	0.03828	0.1573		Mef2c	Mef2cMef2c	myocyte enhancer factor 2C	-2.719	-1.443	0.01492	0.06679
	Clu	CluClu	clusterin	-2.534	-1.341	0.03841	0.1573		Nubp1	Nubp1Nubp1	nucleotide binding protein 1	-1.428	-0.514	0.01521	0.06768
	Yy1	Yy1Yy1	YY1 transcription factor	-1.413	-0.499	0.03919	0.1588		Smn1	Smn1Smn1	survival motor neuron 1	-1.662	-0.733	0.01603	0.07013
	Lamp3	Lamp3Lamp3	lysosomal-associated membrane protein 3	-1.96	-0.971	0.04015	0.1602		Nfkb1	Nfkb1Nfkb1	nuclear factor of kappa light polypeptide gene enhancer in B cells 1, p105	-1.506	-0.591	0.01713	0.07327
	Tmed1	Tmed1Tmed1	transmembrane p24 trafficking protein 1	-1.588	-0.667	0.04016	0.1602		Ccl28	Ccl28Ccl28	chemokine (C-C motif) ligand 28	-1.854	-0.89	0.01793	0.07591
	Mapk11	Mapk11Mapk11	mitogen-activated protein kinase 11	-1.797	-0.846	0.04074	0.1614		Il1r1	Il1r1Il1r1	interleukin 1 receptor, type I	-2.075	-1.053	0.01795	0.07591
	Ifnb1	Ifnb1Ifnb1	interferon beta 1, fibroblast	-2.284	-1.191	0.04107	0.1614		Hck	HckHck	hemopoietic cell kinase	-1.662	-0.733	0.01804	0.07591
	Ccr9	Ccr9Ccr9	chemokine (C-C motif) receptor 9	-2.143	-1.1	0.0411	0.1614		Vegfc	VegfcVegfc	vascular endothelial growth factor C	-2.688	-1.426	0.01838	0.076
	Reps1	Reps1Reps1	RalBP1 associated Eps domain containing protein	-1.43	-0.516	0.04165	0.1627		Ptgdr2	Ptgdr2Ptgdr2	prostaglandin D2 receptor 2	-1.994	-0.996	0.0184	0.076
	Gpi1	Gpi1Gpi1	glucose phosphate isomerase 1	-1.727	-0.788	0.04194	0.1627		Vim	VimVim	vimentin	-1.629	-0.704	0.01842	0.076
	Tnfrsf9	Tnfrsf9Tnfrsf9	tumor necrosis factor receptor superfamily, member 9	-2.004	-1.003	0.04275	0.1638		Erbb2	Erbb2Erbb2	erb-b2 receptor tyrosine kinase 2	-1.724	-0.786	0.01856	0.076
	Dusp6	Dusp6Dusp6	dual specificity phosphatase 6	-1.55	-0.632	0.04324	0.1648		Lamp3	Lamp3Lamp3	lysosomal-associated membrane protein 3	-2.08	-1.057	0.01885	0.07681
	Runx1	Runx1Runx1	runt related transcription factor 1	-1.552	-0.634	0.045	0.1693		C8a	C8aC8a	complement component 8, alpha polypeptide	-2.043	-1.031	0.01937	0.0777
	Mapk1	Mapk1Mapk1	mitogen-activated protein kinase 1	-1.402	-0.488	0.04508	0.1693		Tgfb3	Tgfb3Tgfb3	transforming growth factor, beta 3	-1.789	-0.839	0.0197	0.0777
	Mbl2	Mbl2Mbl2	mannose-binding lectin (protein C) 2	-1.889	-0.918	0.04682	0.1738		Tlr3	Tlr3Tlr3	toll-like receptor 3	-1.791	-0.841	0.01981	0.0777
	Hif1a	Hif1aHif1a	hypoxia inducible factor 1, alpha subunit	-1.425	-0.511	0.04696	0.1738		Cxcl1	Cxcl1Cxcl1	chemokine (C-X-C motif) ligand 1	-4.716	-2.237	0.01985	0.0777
	Erbb2	Erbb2Erbb2	erb-b2 receptor tyrosine kinase 2	-1.618	-0.694	0.04785	0.1763		Slc7a11	Slc7a11Slc7a11	solute carrier family 7 (cationic amino acid transporter, y+ system), member 11	-2.053	-1.038	0.01994	0.0777
	Ccr7	Ccr7Ccr7	chemokine (C-C motif) receptor 7	-1.776	-0.829	0.0491	0.18		Tbp	TbpTbp	TATA box binding protein	-1.812	-0.858	0.02006	0.0777
	H2-Ob	H2-ObH2-Ob	histocompatibility 2, O region beta locus	-2.238	-1.162	0.04954	0.1808		Sap130	Sap130Sap130	Sin3A associated protein	-2.227	-1.155	0.02039	0.07822
									Klra17	Klra17Klra17	killer cell lectin-like receptor, subfamily A, member 17	-2.76	-1.465	0.02059	0.0783
									Ltbr	LtbrLtbr	lymphotoxin B receptor	-1.473	-0.559	0.02074	0.0783
									Cyld	CyldCyld	CYLD lysine 63 deubiquitinase	-1.399	-0.484	0.02123	0.07971
									Tnfrsf13c	Tnfrsf13cTnfrsf13c	tumor necrosis factor receptor superfamily, member 13c	-2.006	-1.004	0.02132	0.07971
									Cd47	Cd47Cd47	CD47 antigen (Rh-related antigen, integrin-associated signal transducer)	-2.628	-1.394	0.02153	0.07975
									Ewsr1	Ewsr1Ewsr1	Ewing sarcoma breakpoint region 1	-1.506	-0.59	0.02154	0.07975
									Ifnb1	Ifnb1Ifnb1	interferon beta 1, fibroblast	-2.415	-1.272	0.0218	0.08015
									Mrc1	Mrc1Mrc1	mannose receptor, C type 1	-2.179	-1.124	0.02186	0.08015
									Ifna4	Ifna4Ifna4	interferon alpha 4	-1.68	-0.748	0.02249	0.08208
									Prkce	PrkcePrkce	protein kinase C, epsilon	-1.485	-0.571	0.02286	0.08303
									Jak2	Jak2Jak2	Janus kinase 2	-2.284	-1.192	0.02339	0.08375
									Il1rap	Il1rapIl1rap	interleukin 1 receptor accessory protein	-1.707	-0.772	0.02349	0.08375
									Klra1	Klra1Klra1	killer cell lectin-like receptor, subfamily A, member 1	-2.034	-1.025	0.02362	0.0838
									Rps6	Rps6Rps6	ribosomal protein S6	-1.432	-0.518	0.02599	0.09095
									Cd34	Cd34Cd34	CD34 antigen	-1.96	-0.971	0.02612	0.09101
									Traf6	Traf6Traf6	TNF receptor-associated factor 6	-1.625	-0.7	0.02714	0.09371
									Tank	TankTank	TRAF family member-associated Nf-kappa B activator	-1.729	-0.79	0.02768	0.09436
									Pou2f2	Pou2f2Pou2f2	POU domain, class 2, transcription factor 2	-1.672	-0.742	0.02773	0.09436
									Abcf1	Abcf1Abcf1	ATP-binding cassette, sub-family F (GCN20), member 1	-1.56	-0.641	0.02792	0.09436
									Cx3cl1	Cx3cl1Cx3cl1	chemokine (C-X3-C motif) ligand 1	-1.97	-0.978	0.02794	0.09436
									Cd63	Cd63Cd63	CD63 antigen	-1.532	-0.616	0.02946	0.09863
									Atf1	Atf1Atf1	activating transcription factor 1	-1.574	-0.655	0.03148	0.1036
									Cd200	Cd200Cd200	CD200 antigen	-1.563	-0.644	0.03278	0.1067
									Gpr44	Ptgdr2Ptgdr2	prostaglandin D2 receptor 2	-1.745	-0.803	0.03334	0.1069
									Casp3	Casp3Casp3	caspase 3	-1.892	-0.92	0.03358	0.1069
									Il5	Il5Il5	interleukin 5	-1.752	-0.809	0.03359	0.1069
									Atf2	Atf2Atf2	activating transcription factor 2	-1.417	-0.503	0.03446	0.1079
									F12	F12F12	coagulation factor XII (Hageman factor)	-1.804	-0.852	0.03479	0.1081
									Pla2g1b	Pla2g1bPla2g1b	phospholipase A2, group IB, pancreas	-1.866	-0.9	0.03483	0.1081
									Tmed1	Tmed1Tmed1	transmembrane p24 trafficking protein 1	-1.564	-0.645	0.03636	0.1115
									Angpt1	Angpt1Angpt1	angiopoietin 1	-1.527	-0.611	0.03659	0.1118
									Dusp6	Dusp6Dusp6	dual specificity phosphatase 6	-1.532	-0.615	0.0383	0.1166
									Aire	AireAire	autoimmune regulator (autoimmune polyendocrinopathy candidiasis ectodermal dystrophy)	-1.72	-0.782	0.03895	0.1181
									Fap	FapFap	fibroblast activation protein	-2.081	-1.057	0.04043	0.1221
									Itgae	ItgaeItgae	integrin alpha E, epithelial-associated	-1.924	-0.944	0.04133	0.1238
									Dll4	Dll4Dll4	delta-like 4 (Drosophila)	-1.673	-0.742	0.04257	0.1266
									Tnfrsf9	Tnfrsf9Tnfrsf9	tumor necrosis factor receptor superfamily, member 9	-1.934	-0.952	0.04259	0.1266
									Il9	Il9Il9	interleukin 9	-1.791	-0.841	0.04302	0.1267
									Tcf7	Tcf7Tcf7	transcription factor 7, T cell specific	-2.248	-1.169	0.04326	0.1267
									Itga6	Itga6Itga6	integrin alpha 6	-1.417	-0.502	0.04327	0.1267
									Cd81	Cd81Cd81	CD81 antigen	-1.384	-0.469	0.04534	0.1317
									Twist1	Twist1Twist1	twist basic helix-loop-helix transcription factor 1	-2.016	-1.011	0.04643	0.1339
									Alcam	AlcamAlcam	activated leukocyte cell adhesion molecule	-1.46	-0.546	0.04756	0.1361
									Sele	SeleSele	selectin, endothelial cell	-1.731	-0.791	0.04772	0.1361
									Nefl	NeflNefl	neurofilament, light polypeptide	-1.936	-0.953	0.04855	0.1374
									Spp1	Spp1Spp1	secreted phosphoprotein 1	-2.262	-1.178	0.04981	0.14

## Sheet: Day 17 upregulated genes
OP versus vehicle day 17 upregulated genes								TOP versus vehicle day 17 upregulated genes
ID	Symbol	Description	FC	logFC	P.Value	adj.P.Val		ID	Symbol	Description	FC	logFC	P.Value	adj.P.Val
Marco	MarcoMarco	macrophage receptor with collagenous structure	12.114	3.599	5.183e-07	9.977e-05		Bst1	Bst1Bst1	bone marrow stromal cell antigen 1	9.441	3.239	5.514e-11	4.246e-08
Cd80	Cd80Cd80	CD80 antigen	3.463	1.792	2.839e-06	0.0002429		Cd38	Cd38Cd38	CD38 antigen	3.16	1.66	1.872e-09	5.573e-07
Bst1	Bst1Bst1	bone marrow stromal cell antigen 1	4.105	2.037	7.426e-06	0.0004399		Lyz2	Lyz2Lyz2	lysozyme 2	8.427	3.075	2.171e-09	5.573e-07
Il18r1	Il18r1Il18r1	interleukin 18 receptor 1	5.139	2.361	1.255e-05	0.0006539		Mertk	MertkMertk	c-mer proto-oncogene tyrosine kinase	2.694	1.43	2.507e-08	4.826e-06
Tnfsf11	Tnfsf11Tnfsf11	tumor necrosis factor (ligand) superfamily, member 11	2.562	1.357	1.274e-05	0.0006539		Marco	MarcoMarco	macrophage receptor with collagenous structure	16.976	4.085	4.437e-08	5.868e-06
Cdkn1a	Cdkn1aCdkn1a	cyclin-dependent kinase inhibitor 1A (P21)	2.13	1.091	1.594e-05	0.0007671		Tlr8	Tlr8Tlr8	toll-like receptor 8	3.057	1.612	4.572e-08	5.868e-06
Cd200r1	Cd200r1Cd200r1	CD200 receptor 1	3.338	1.739	1.994e-05	0.0008528		Cd200r1	Cd200r1Cd200r1	CD200 receptor 1	5.008	2.324	6.742e-08	6.547e-06
Lyz2	Lyz2Lyz2	lysozyme 2	3.804	1.928	5.297e-05	0.001773		Cd80	Cd80Cd80	CD80 antigen	4.311	2.108	1.322e-07	1.018e-05
Abca1	Abca1Abca1	ATP-binding cassette, sub-family A (ABC1), member 1	3.337	1.738	5.818e-05	0.00182		Abca1	Abca1Abca1	ATP-binding cassette, sub-family A (ABC1), member 1	5.282	2.401	1.507e-07	1.055e-05
Klrd1	Klrd1Klrd1	killer cell lectin-like receptor, subfamily D, member 1	3.959	1.985	5.909e-05	0.00182		Cdkn1a	Cdkn1aCdkn1a	cyclin-dependent kinase inhibitor 1A (P21)	2.556	1.354	3.208e-07	2.059e-05
Icos	IcosIcos	inducible T cell co-stimulator	2.955	1.563	7.659e-05	0.002184		Icos	IcosIcos	inducible T cell co-stimulator	4.217	2.076	5.941e-07	2.904e-05
Il7r	Il7rIl7r	interleukin 7 receptor	4.837	2.274	0.0001045	0.00267		Il7r	Il7rIl7r	interleukin 7 receptor	8.463	3.081	6.035e-07	2.904e-05
Angpt2	Angpt2Angpt2	angiopoietin 2	2.532	1.34	0.0001048	0.00267		Cd68	Cd68Cd68	CD68 antigen	2.869	1.52	9.049e-07	4.099e-05
Cfp	CfpCfp	complement factor properdin	3.776	1.917	0.0001164	0.002779		Il18r1	Il18r1Il18r1	interleukin 18 receptor 1	6.701	2.744	1.083e-06	4.634e-05
Ccl17	Ccl17Ccl17	chemokine (C-C motif) ligand 17	3.991	1.997	0.0001191	0.002779		Lgals3	Lgals3Lgals3	lectin, galactose binding, soluble 3	2.429	1.281	1.178e-06	4.704e-05
Ccl6	Ccl6Ccl6	chemokine (C-C motif) ligand 6	4.702	2.233	0.00014	0.003109		Slc11a1	Slc11a1Slc11a1	solute carrier family 11 (proton-coupled divalent metal ion transporters), member 1	2.972	1.572	1.245e-06	4.704e-05
Cd2	Cd2Cd2	CD2 antigen	3.273	1.711	0.0002268	0.004347		Apoe	ApoeApoe	apolipoprotein E	4.357	2.123	2.173e-06	7.274e-05
Cd38	Cd38Cd38	CD38 antigen	1.905	0.93	0.0002575	0.004611		Klrd1	Klrd1Klrd1	killer cell lectin-like receptor, subfamily D, member 1	5.409	2.435	2.38e-06	7.636e-05
Ltb	LtbLtb	lymphotoxin B	2.983	1.577	0.000377	0.006312		Ccl6	Ccl6Ccl6	chemokine (C-C motif) ligand 6	7.367	2.881	2.742e-06	8.122e-05
Arg1	Arg1Arg1	arginase, liver	6.484	2.697	0.0003853	0.006312		Prkcd	PrkcdPrkcd	protein kinase C, delta	1.64	0.713	3.81e-06	0.0001048
Thy1	Thy1Thy1	thymus cell antigen 1, theta	3.051	1.609	0.0004008	0.006429		Cd2	Cd2Cd2	CD2 antigen	4.75	2.248	3.812e-06	0.0001048
Cd247	Cd247Cd247	CD247 antigen	2.504	1.324	0.0004806	0.007257		Cd84	Cd84Cd84	CD84 antigen	2.971	1.571	4.023e-06	0.0001068
Ccl21a	Ccl21aCcl21a	chemokine (C-C motif) ligand 21A (serine)	23.631	4.563	0.0005113	0.007428		Cd37	Cd37Cd37	CD37 antigen	4.908	2.295	7.147e-06	0.0001572
Amica1	JamlJaml	junction adhesion molecule like	2.144	1.101	0.0005634	0.007787		Tnfsf11	Tnfsf11Tnfsf11	tumor necrosis factor (ligand) superfamily, member 11	2.683	1.424	9.027e-06	0.0001881
Ifng	IfngIfng	interferon gamma	2.895	1.534	0.0005692	0.007787		Il21r	Il21rIl21r	interleukin 21 receptor	2.401	1.264	9.037e-06	0.0001881
Slc11a1	Slc11a1Slc11a1	solute carrier family 11 (proton-coupled divalent metal ion transporters), member 1	2.078	1.055	0.0005765	0.007787		Slamf7	Slamf7Slamf7	SLAM family member 7	2.879	1.525	9.831e-06	0.0001992
Cd3e	Cd3eCd3e	CD3 antigen, epsilon polypeptide	3.649	1.868	0.000628	0.008254		Cfp	CfpCfp	complement factor properdin	4.867	2.283	1.035e-05	0.0002043
Tlr8	Tlr8Tlr8	toll-like receptor 8	1.916	0.938	0.0006325	0.008254		Cxcr6	Cxcr6Cxcr6	chemokine (C-X-C motif) receptor 6	5.948	2.572	1.682e-05	0.0003084
Cxcr6	Cxcr6Cxcr6	chemokine (C-X-C motif) receptor 6	3.837	1.94	0.0006827	0.008762		Arg1	Arg1Arg1	arginase, liver	9.933	3.312	2.835e-05	0.0004962
Tlr5	Tlr5Tlr5	toll-like receptor 5	2.314	1.21	0.0006958	0.008783		Ifng	IfngIfng	interferon gamma	3.705	1.889	4.548e-05	0.0007451
Mertk	MertkMertk	c-mer proto-oncogene tyrosine kinase	1.747	0.805	0.000726	0.008902		Lck	LckLck	lymphocyte protein tyrosine kinase	3.359	1.748	5.236e-05	0.000815
Lck	LckLck	lymphocyte protein tyrosine kinase	2.639	1.4	0.0007399	0.008902		Amica1	JamlJaml	junction adhesion molecule like	2.533	1.341	5.37e-05	0.000815
Cd3g	Cd3gCd3g	CD3 antigen, gamma polypeptide	3.71	1.892	0.0008848	0.01032		Clec4n	Clec4nClec4n	C-type lectin domain family 4, member n	2.756	1.462	5.398e-05	0.000815
Ctsg	CtsgCtsg	cathepsin G	2.42	1.275	0.001066	0.01149		Angpt2	Angpt2Angpt2	angiopoietin 2	2.694	1.43	6.069e-05	0.0008512
Cd3d	Cd3dCd3d	CD3 antigen, delta polypeptide	2.791	1.481	0.001099	0.01159		Selplg	SelplgSelplg	selectin, platelet (p-selectin) ligand	2.433	1.283	6.204e-05	0.0008512
Cd37	Cd37Cd37	CD37 antigen	2.992	1.581	0.001135	0.01175		Cd3e	Cd3eCd3e	CD3 antigen, epsilon polypeptide	4.839	2.275	6.227e-05	0.0008512
C2	C2C2	complement component 2 (within H-2S)	3.862	1.949	0.001144	0.01175		Thy1	Thy1Thy1	thymus cell antigen 1, theta	3.702	1.888	6.301e-05	0.0008512
Lgals3	Lgals3Lgals3	lectin, galactose binding, soluble 3	1.745	0.803	0.001223	0.01223		Stat4	Stat4Stat4	signal transducer and activator of transcription 4	2.677	1.421	6.979e-05	0.0009108
Cd68	Cd68Cd68	CD68 antigen	1.917	0.939	0.001264	0.01247		Cd3d	Cd3dCd3d	CD3 antigen, delta polypeptide	3.674	1.877	7.143e-05	0.0009166
Il1rn	Il1rnIl1rn	interleukin 1 receptor antagonist	3.701	1.888	0.00131	0.01277		Cd8b1	Cd8b1Cd8b1	CD8 antigen, beta chain 1	4.305	2.106	7.539e-05	0.0009517
Syk	SykSyk	spleen tyrosine kinase	2.137	1.095	0.001374	0.01323		Trem2	Trem2Trem2	triggering receptor expressed on myeloid cells 2	3.919	1.97	9.013e-05	0.001089
Cd53	Cd53Cd53	CD53 antigen	2.519	1.333	0.001432	0.01361		Ctsw	CtswCtsw	cathepsin W	3.742	1.904	9.052e-05	0.001089
Fcer1a	Fcer1aFcer1a	Fc receptor, IgE, high affinity I, alpha polypeptide	2.431	1.282	0.001451	0.01363		Syk	SykSyk	spleen tyrosine kinase	2.621	1.39	9.659e-05	0.001127
Gzmb	GzmbGzmb	granzyme B	3.161	1.661	0.001747	0.01606		Cd3g	Cd3gCd3g	CD3 antigen, gamma polypeptide	4.92	2.299	0.0001014	0.001166
Apoe	ApoeApoe	apolipoprotein E	2.5	1.322	0.001773	0.01606		Gzmb	GzmbGzmb	granzyme B	4.34	2.118	0.0001266	0.001434
Cma1	Cma1Cma1	chymase 1, mast cell	4.229	2.08	0.001825	0.01634		Ltb	LtbLtb	lymphotoxin B	3.344	1.741	0.0001461	0.001607
Mpo	MpoMpo	myeloperoxidase	2.129	1.09	0.00194	0.01717		Cd274	Cd274Cd274	CD274 antigen	3.147	1.654	0.0001808	0.001933
Cd84	Cd84Cd84	CD84 antigen	1.976	0.983	0.002274	0.01924		Il12rb2	Il12rb2Il12rb2	interleukin 12 receptor, beta 2	3.202	1.679	0.0002404	0.002435
Klrc1	Klrc1Klrc1	killer cell lectin-like receptor subfamily C, member 1	3.685	1.882	0.002346	0.01964		Cd36	Cd36Cd36	CD36 antigen	9.427	3.237	0.0002579	0.002579
Ccrl2	Ccrl2Ccrl2	chemokine (C-C motif) receptor-like 2	2.543	1.346	0.002495	0.02009		Cd247	Cd247Cd247	CD247 antigen	2.666	1.415	0.0003016	0.002939
Cd8b1	Cd8b1Cd8b1	CD8 antigen, beta chain 1	2.869	1.52	0.002801	0.02157		Prf1	Prf1Prf1	perforin 1 (pore forming protein)	5.152	2.365	0.0003574	0.003398
Selplg	SelplgSelplg	selectin, platelet (p-selectin) ligand	1.874	0.906	0.003055	0.02329		Nos2	Nos2Nos2	nitric oxide synthase 2, inducible	3.903	1.964	0.0004273	0.004012
Il12rb2	Il12rb2Il12rb2	interleukin 12 receptor, beta 2	2.455	1.296	0.003164	0.02388		Mr1	Mr1Mr1	major histocompatibility complex, class I-related	2.385	1.254	0.0004351	0.004036
Ccl5	Ccl5Ccl5	chemokine (C-C motif) ligand 5	2.338	1.225	0.003427	0.02466		Ly9	Ly9Ly9	lymphocyte antigen 9	2.539	1.345	0.0005166	0.00468
Ctsw	CtswCtsw	cathepsin W	2.56	1.356	0.00354	0.025		Klrc2	Klrc2Klrc2	killer cell lectin-like receptor subfamily C, member 2	4.895	2.291	0.0005928	0.005187
Cd36	Cd36Cd36	CD36 antigen	5.571	2.478	0.003578	0.02504		Ccl21a	Ccl21aCcl21a	chemokine (C-C motif) ligand 21A (serine)	23.984	4.584	0.0006885	0.005957
Mr1	Mr1Mr1	major histocompatibility complex, class I-related	1.998	0.998	0.003615	0.02508		Fasl	FaslFasl	Fas ligand (TNF superfamily, member 6)	2.827	1.499	0.0007284	0.006232
C3	C3C3	complement component 3	3.099	1.632	0.003787	0.02604		Klrc1	Klrc1Klrc1	killer cell lectin-like receptor subfamily C, member 1	4.436	2.149	0.0007835	0.006558
Fasl	FaslFasl	Fas ligand (TNF superfamily, member 6)	2.356	1.236	0.003859	0.02629		Cd8a	Cd8aCd8a	CD8 antigen, alpha chain	3.876	1.955	0.000796	0.006591
Icam1	Icam1Icam1	intercellular adhesion molecule 1	2.489	1.315	0.004138	0.02747		Cd48	Cd48Cd48	CD48 antigen	2.06	1.043	0.0008243	0.006752
Ppbp	PpbpPpbp	pro-platelet basic protein	4.025	2.009	0.004206	0.02768		Cd97	Adgre5Adgre5	adhesion G protein-coupled receptor E5	2.341	1.227	0.0008565	0.006942
Stat4	Stat4Stat4	signal transducer and activator of transcription 4	1.959	0.97	0.004405	0.02875		Nfatc2	Nfatc2Nfatc2	nuclear factor of activated T cells, cytoplasmic, calcineurin dependent 2	1.923	0.943	0.0008818	0.007
Ccl8	Ccl8Ccl8	chemokine (C-C motif) ligand 8	2.523	1.335	0.004581	0.02955		Ccl8	Ccl8Ccl8	chemokine (C-C motif) ligand 8	3.068	1.617	0.0009246	0.007265
Cd274	Cd274Cd274	CD274 antigen	2.295	1.199	0.004605	0.02955		Itk	ItkItk	IL2 inducible T cell kinase	2.517	1.332	0.001003	0.007722
Cd5	Cd5Cd5	CD5 antigen	2.104	1.073	0.00543	0.03399		Ticam2	Ticam2Ticam2	toll-like receptor adaptor molecule 2	2.259	1.175	0.001034	0.007806
Rora	RoraRora	RAR-related orphan receptor alpha	2.464	1.301	0.005678	0.035		Slamf1	Slamf1Slamf1	signaling lymphocytic activation molecule family member 1	2.348	1.232	0.001082	0.007931
Prkcd	PrkcdPrkcd	protein kinase C, delta	1.321	0.402	0.0057	0.035		Ctss	CtssCtss	cathepsin S	2.207	1.142	0.001119	0.00813
Slamf7	Slamf7Slamf7	SLAM family member 7	1.867	0.901	0.005727	0.035		A2m	A2mA2m	alpha-2-macroglobulin	3.534	1.821	0.001279	0.009035
Il23r	Il23rIl23r	interleukin 23 receptor	1.942	0.958	0.006222	0.03743		Havcr2	Havcr2Havcr2	hepatitis A virus cellular receptor 2	1.777	0.829	0.001354	0.009475
Cfh	CfhCfh	complement component factor h	3.402	1.767	0.006656	0.03941		Cd53	Cd53Cd53	CD53 antigen	2.578	1.366	0.001501	0.01014
Ccl9	Ccl9Ccl9	chemokine (C-C motif) ligand 9	3.498	1.807	0.006827	0.03952		Tigit	TigitTigit	T cell immunoreceptor with Ig and ITIM domains	2.209	1.144	0.001581	0.0105
A2m	A2mA2m	alpha-2-macroglobulin	2.758	1.463	0.007271	0.04123		Tnfsf13	Tnfsf13Tnfsf13	tumor necrosis factor (ligand) superfamily, member 13	2.038	1.027	0.001612	0.01061
Cd8a	Cd8aCd8a	CD8 antigen, alpha chain	2.837	1.505	0.007282	0.04123		Gzmk	GzmkGzmk	granzyme K	3.447	1.786	0.001713	0.01109
Clec7a	Clec7aClec7a	C-type lectin domain family 7, member a	2.026	1.019	0.007623	0.04254		Cd5	Cd5Cd5	CD5 antigen	2.377	1.249	0.001755	0.0112
Ido1	Ido1Ido1	indoleamine 2,3-dioxygenase 1	2.56	1.356	0.007771	0.04266		Rora	RoraRora	RAR-related orphan receptor alpha	2.868	1.52	0.001785	0.01123
Cd97	Adgre5Adgre5	adhesion G protein-coupled receptor E5	1.92	0.941	0.007883	0.04275		Ccl17	Ccl17Ccl17	chemokine (C-C motif) ligand 17	3.134	1.648	0.001809	0.01123
Klrk1	Klrk1Klrk1	killer cell lectin-like receptor subfamily K, member 1	2.533	1.341	0.008442	0.04546		Ccl9	Ccl9Ccl9	chemokine (C-C motif) ligand 9	4.435	2.149	0.001884	0.01151
Nos2	Nos2Nos2	nitric oxide synthase 2, inducible	2.638	1.4	0.008863	0.04739		Clec7a	Clec7aClec7a	C-type lectin domain family 7, member a	2.342	1.228	0.001899	0.01151
Gzmk	GzmkGzmk	granzyme K	2.7	1.433	0.009062	0.04801		C2	C2C2	complement component 2 (within H-2S)	3.616	1.855	0.00257	0.01477
Itk	ItkItk	IL2 inducible T cell kinase	2.013	1.009	0.009533	0.04918		Cd6	Cd6Cd6	CD6 antigen	2.694	1.43	0.002656	0.01504
Klrc2	Klrc2Klrc2	killer cell lectin-like receptor subfamily C, member 2	3.157	1.659	0.009581	0.04918		C5ar1	C5ar1C5ar1	complement component 5a receptor 1	2.245	1.167	0.002684	0.01508
Prf1	Prf1Prf1	perforin 1 (pore forming protein)	3.072	1.619	0.01068	0.05413		Ccl5	Ccl5Ccl5	chemokine (C-C motif) ligand 5	2.441	1.288	0.002842	0.01586
Tnfsf14	Tnfsf14Tnfsf14	tumor necrosis factor (ligand) superfamily, member 14	1.998	0.999	0.01109	0.05522		C3	C3C3	complement component 3	3.315	1.729	0.002923	0.01619
Vwf	VwfVwf	Von Willebrand factor	2.293	1.197	0.01112	0.05522		Cfh	CfhCfh	complement component factor h	3.983	1.994	0.003032	0.01656
Slamf1	Slamf1Slamf1	signaling lymphocytic activation molecule family member 1	1.883	0.913	0.01176	0.05769		Cd96	Cd96Cd96	CD96 antigen	1.999	0.999	0.004013	0.02146
Cd48	Cd48Cd48	CD48 antigen	1.686	0.753	0.01186	0.05779		Klrk1	Klrk1Klrk1	killer cell lectin-like receptor subfamily K, member 1	2.82	1.496	0.004439	0.02341
Cxcl3	Cxcl3Cxcl3	chemokine (C-X-C motif) ligand 3	8.165	3.029	0.01311	0.06272		C1qa	C1qaC1qa	complement component 1, q subcomponent, alpha polypeptide	1.633	0.707	0.004517	0.02366
Tigit	TigitTigit	T cell immunoreceptor with Ig and ITIM domains	1.811	0.857	0.01392	0.06548		Icam1	Icam1Icam1	intercellular adhesion molecule 1	2.51	1.328	0.00492	0.0256
Il12a	Il12aIl12a	interleukin 12a	2.001	1.001	0.01395	0.06548		Cd22	Cd22Cd22	CD22 antigen	2.632	1.396	0.005269	0.02723
Tlr4	Tlr4Tlr4	toll-like receptor 4	2.139	1.097	0.01612	0.07218		Pdcd1	Pdcd1Pdcd1	programmed cell death 1	4.252	2.088	0.005403	0.02727
Pdcd1lg2	Pdcd1lg2Pdcd1lg2	programmed cell death 1 ligand 2	2.739	1.454	0.01777	0.07897		Cyfip2	Cyfip2Cyfip2	cytoplasmic FMR1 interacting protein 2	1.898	0.924	0.006166	0.03005
Il21r	Il21rIl21r	interleukin 21 receptor	1.551	0.633	0.01805	0.07897		Il1rn	Il1rnIl1rn	interleukin 1 receptor antagonist	3.048	1.608	0.007428	0.03519
Spink5	Spink5Spink5	serine peptidase inhibitor, Kazal type 5	1.9	0.926	0.01832	0.07902		Ido1	Ido1Ido1	indoleamine 2,3-dioxygenase 1	2.607	1.382	0.008398	0.03827
Msln	MslnMsln	mesothelin	2.074	1.052	0.0184	0.07902		Pdcd1lg2	Pdcd1lg2Pdcd1lg2	programmed cell death 1 ligand 2	3.176	1.667	0.008486	0.03844
Clec4n	Clec4nClec4n	C-type lectin domain family 4, member n	1.748	0.806	0.01883	0.07968		Hcst	HcstHcst	hematopoietic cell signal transducer	3.712	1.892	0.008668	0.0388
Nfatc2	Nfatc2Nfatc2	nuclear factor of activated T cells, cytoplasmic, calcineurin dependent 2	1.554	0.636	0.01929	0.08118		Plau	PlauPlau	plasminogen activator, urokinase	1.737	0.796	0.009257	0.04027
Itgb4	Itgb4Itgb4	integrin beta 4	2.108	1.076	0.01951	0.08143		Abcg1	Abcg1Abcg1	ATP-binding cassette, sub-family G (WHITE), member 1	2.784	1.477	0.009853	0.04239
Fos	FosFos	FBJ osteosarcoma oncogene	1.906	0.93	0.01956	0.08143		Itgam	ItgamItgam	integrin alpha M	2.415	1.272	0.01131	0.04731
Il4	Il4Il4	interleukin 4	1.78	0.832	0.02246	0.08915		Tlr4	Tlr4Tlr4	toll-like receptor 4	2.282	1.19	0.01137	0.04731
Pecam1	Pecam1Pecam1	platelet/endothelial cell adhesion molecule 1	2.159	1.11	0.02263	0.08937		Ctsh	CtshCtsh	cathepsin H	1.434	0.52	0.0115	0.04759
Tal1	Tal1Tal1	T cell acute lymphocytic leukemia 1	1.95	0.964	0.02322	0.09122		Tnf	TnfTnf	tumor necrosis factor	1.84	0.88	0.01159	0.0477
Tbx21	Tbx21Tbx21	T-box 21	1.739	0.798	0.02462	0.09582		Fos	FosFos	FBJ osteosarcoma oncogene	2.036	1.026	0.0126	0.05132
Chit1	Chit1Chit1	chitinase 1 (chitotriosidase)	2.062	1.044	0.0251	0.09662		Cma1	Cma1Cma1	chymase 1, mast cell	3.235	1.694	0.01297	0.0519
Ly9	Ly9Ly9	lymphocyte antigen 9	1.775	0.828	0.02532	0.09698		Mrc1	Mrc1Mrc1	mannose receptor, C type 1	2.256	1.174	0.01301	0.0519
Serping1	Serping1Serping1	serine (or cysteine) peptidase inhibitor, clade G, member 1	2.665	1.414	0.02575	0.0979		Lag3	Lag3Lag3	lymphocyte-activation gene 3	2.663	1.413	0.01393	0.05501
Ccl22	Ccl22Ccl22	chemokine (C-C motif) ligand 22	1.847	0.885	0.02592	0.0979		Serping1	Serping1Serping1	serine (or cysteine) peptidase inhibitor, clade G, member 1	3.044	1.606	0.01417	0.05566
C5ar1	C5ar1C5ar1	complement component 5a receptor 1	1.763	0.818	0.02862	0.1055		Tlr5	Tlr5Tlr5	toll-like receptor 5	1.845	0.884	0.01492	0.05774
Irak4	Irak4Irak4	interleukin-1 receptor-associated kinase 4	1.651	0.723	0.03058	0.1084		Tbx21	Tbx21Tbx21	T-box 21	1.831	0.873	0.01718	0.06517
Tnf	TnfTnf	tumor necrosis factor	1.657	0.728	0.03069	0.1084		Tnfsf14	Tnfsf14Tnfsf14	tumor necrosis factor (ligand) superfamily, member 14	1.906	0.93	0.02129	0.07843
Irak3	Irak3Irak3	interleukin-1 receptor-associated kinase 3	2.023	1.016	0.03353	0.1158		Cd28	Cd28Cd28	CD28 antigen	1.686	0.753	0.02211	0.08107
Mrc1	Mrc1Mrc1	mannose receptor, C type 1	1.955	0.967	0.03436	0.1181		Il23r	Il23rIl23r	interleukin 23 receptor	1.752	0.809	0.02398	0.08643
Hspb2	Hspb2Hspb2	heat shock protein 2	1.873	0.905	0.036	0.1227		Il1rl1	Il1rl1Il1rl1	interleukin 1 receptor-like 1	2.389	1.256	0.02402	0.08643
Cd160	Cd160Cd160	CD160 antigen	1.715	0.778	0.03932	0.1322		Cmklr1	Cmklr1Cmklr1	chemokine-like receptor 1	1.456	0.542	0.02677	0.09452
Ccl19	Ccl19Ccl19	chemokine (C-C motif) ligand 19	2.684	1.425	0.04055	0.1346		Ppbp	PpbpPpbp	pro-platelet basic protein	3.001	1.586	0.02711	0.0949
Csf3r	Csf3rCsf3r	colony stimulating factor 3 receptor (granulocyte)	2.138	1.097	0.0433	0.1407		Cd1d1	Cd1d1Cd1d1	CD1d1 antigen	1.832	0.873	0.02801	0.09679
Cxcl5	Cxcl5Cxcl5	chemokine (C-X-C motif) ligand 5	3.295	1.72	0.0435	0.1407		Ccl19	Ccl19Ccl19	chemokine (C-C motif) ligand 19	2.977	1.574	0.02822	0.09679
Cmah	CmahCmah	cytidine monophospho-N-acetylneuraminic acid hydroxylase	2.463	1.301	0.04516	0.1447		Il2rb	Il2rbIl2rb	interleukin 2 receptor, beta chain	2.613	1.386	0.02823	0.09679
Trem2	Trem2Trem2	triggering receptor expressed on myeloid cells 2	1.935	0.952	0.04559	0.1447		Cxcr3	Cxcr3Cxcr3	chemokine (C-X-C motif) receptor 3	2.029	1.021	0.02874	0.0968
Il11ra1	Il11ra1Il11ra1	interleukin 11 receptor, alpha chain 1	2.174	1.12	0.04812	0.1494		Il11ra1	Il11ra1Il11ra1	interleukin 11 receptor, alpha chain 1	2.427	1.279	0.02879	0.0968
								Msln	MslnMsln	mesothelin	1.971	0.979	0.03277	0.1069
								Thbs1	Thbs1Thbs1	thrombospondin 1	2.157	1.109	0.0333	0.1077
								Tbk1	Tbk1Tbk1	TANK-binding kinase 1	1.317	0.397	0.03366	0.1081
								Hspb2	Hspb2Hspb2	heat shock protein 2	1.924	0.944	0.03368	0.1081
								Tnfsf4	Tnfsf4Tnfsf4	tumor necrosis factor (ligand) superfamily, member 4	1.936	0.953	0.03518	0.112
								Ccr3	Ccr3Ccr3	chemokine (C-C motif) receptor 3	2.484	1.313	0.03581	0.1126
								F2rl1	F2rl1F2rl1	coagulation factor II (thrombin) receptor-like 1	1.888	0.917	0.03596	0.1126
								Itgb2	Itgb2Itgb2	integrin beta 2	1.557	0.639	0.03612	0.1126
								Fcgr4	Fcgr4Fcgr4	Fc receptor, IgG, low affinity IV	1.994	0.995	0.03855	0.1169
								Cxcl3	Cxcl3Cxcl3	chemokine (C-X-C motif) ligand 3	5.804	2.537	0.04272	0.128
								Vwf	VwfVwf	Von Willebrand factor	1.934	0.951	0.04877	0.1433
								Il2	Il2Il2	interleukin 2	1.603	0.681	0.04924	0.1437
								Irak4	Irak4Irak4	interleukin-1 receptor-associated kinase 4	1.597	0.676	0.04927	0.1437

## Sheet: Day 17 downregulated genes
OP versus vehicle day 17 downregulated genes									TOP versus vehicle day 17 downregulated genes
ID	Symbol	Description	FC	logFC	P.Value	adj.P.Val			ID	Symbol	Description	FC	logFC	P.Value	adj.P.Val
Cx3cr1	Cx3cr1Cx3cr1	chemokine (C-X3-C motif) receptor 1	-7.85	-2.973	2.51e-08	1.932e-05			Cx3cr1	Cx3cr1Cx3cr1	chemokine (C-X3-C motif) receptor 1	-7.735	-2.951	6.802e-08	6.547e-06
Atf2	Atf2Atf2	activating transcription factor 2	-2.33	-1.22	1.89e-07	7.277e-05			Atf2	Atf2Atf2	activating transcription factor 2	-2.428	-1.28	1.193e-07	1.018e-05
Sh2d1b1	Sh2d1b1Sh2d1b1	SH2 domain containing 1B1	-4.584	-2.197	4.056e-07	9.977e-05			Tgfbr1	Tgfbr1Tgfbr1	transforming growth factor, beta receptor I	-2.057	-1.041	3.643e-07	2.158e-05
Rpl19	Rpl19Rpl19	ribosomal protein L19	-2.792	-1.481	7.067e-07	0.0001088			Rpl19	Rpl19Rpl19	ribosomal protein L19	-2.904	-1.538	5.849e-07	2.904e-05
Smad3	Smad3Smad3	SMAD family member 3	-2.672	-1.418	1.272e-06	0.0001632			Smad3	Smad3Smad3	SMAD family member 3	-2.75	-1.46	1.283e-06	4.704e-05
Fez1	Fez1Fez1	fasciculation and elongation protein zeta 1 (zygin I)	-2.787	-1.479	1.564e-06	0.0001721			Pdgfrb	PdgfrbPdgfrb	platelet derived growth factor receptor, beta polypeptide	-3.695	-1.885	1.561e-06	5.463e-05
Tgfbr1	Tgfbr1Tgfbr1	transforming growth factor, beta receptor I	-1.909	-0.933	2.216e-06	0.0002133			Sh2d1b1	Sh2d1b1Sh2d1b1	SH2 domain containing 1B1	-4.229	-2.08	2.629e-06	8.097e-05
Tirap	TirapTirap	toll-interleukin 1 receptor (TIR) domain-containing adaptor protein	-1.906	-0.93	3.516e-06	0.0002707			Mapk8	Mapk8Mapk8	mitogen-activated protein kinase 8	-1.891	-0.919	4.376e-06	0.0001123
Ltbr	LtbrLtbr	lymphotoxin B receptor	-2.083	-1.058	5.954e-06	0.0003923			Ltbr	LtbrLtbr	lymphotoxin B receptor	-2.151	-1.105	4.525e-06	0.0001124
Hck	HckHck	hemopoietic cell kinase	-2.559	-1.355	6.113e-06	0.0003923			Edc3	Edc3Edc3	enhancer of mRNA decapping 3	-1.886	-0.915	4.738e-06	0.000114
Pou2f2	Pou2f2Pou2f2	POU domain, class 2, transcription factor 2	-2.613	-1.386	1.957e-05	0.0008528			Myc	MycMyc	myelocytomatosis oncogene	-3.488	-1.802	4.988e-06	0.0001164
Lilra5	Lilra5Lilra5	leukocyte immunoglobulin-like receptor, subfamily A (with TM domain), member 5	-4.285	-2.099	3.096e-05	0.001255			Tgfb3	Tgfb3Tgfb3	transforming growth factor, beta 3	-3.079	-1.623	5.948e-06	0.0001347
Dusp6	Dusp6Dusp6	dual specificity phosphatase 6	-2.268	-1.182	3.521e-05	0.001355			Isg15	Isg15Isg15	ISG15 ubiquitin-like modifier	-5.043	-2.334	1.42e-05	0.0002734
Myc	MycMyc	myelocytomatosis oncogene	-2.946	-1.559	4.062e-05	0.001489			Il1r1	Il1r1Il1r1	interleukin 1 receptor, type I	-3.748	-1.906	1.547e-05	0.0002905
Tgfb3	Tgfb3Tgfb3	transforming growth factor, beta 3	-2.636	-1.398	4.994e-05	0.001748			Tgfb2	Tgfb2Tgfb2	transforming growth factor, beta 2	-4.458	-2.156	2.556e-05	0.0004578
Isg15	Isg15Isg15	ISG15 ubiquitin-like modifier	-4.204	-2.072	6.498e-05	0.001924			Fadd	FaddFadd	Fas (TNFRSF6)-associated via death domain	-2.068	-1.048	2.99e-05	0.0005056
Ikzf2	Ikzf2Ikzf2	IKAROS family zinc finger 2	-2.105	-1.074	0.0001019	0.00267			Xbp1	Xbp1Xbp1	X-box binding protein 1	-1.629	-0.704	3.02e-05	0.0005056
Icosl	IcoslIcosl	icos ligand	-1.885	-0.915	0.0001075	0.00267			Itga1	Itga1Itga1	integrin alpha 1	-3.191	-1.674	4.728e-05	0.0007584
Ecsit	EcsitEcsit	ECSIT signalling integrator	-1.889	-0.918	0.0001413	0.003109			Tab1	Tab1Tab1	TGF-beta activated kinase 1/MAP3K7 binding protein 1	-1.79	-0.84	5.55e-05	0.0008218
Csf1r	Csf1rCsf1r	colony stimulating factor 1 receptor	-1.923	-0.944	0.0001583	0.003387			Fez1	Fez1Fez1	fasciculation and elongation protein zeta 1 (zygin I)	-2.387	-1.255	5.767e-05	0.0008379
Tab1	Tab1Tab1	TGF-beta activated kinase 1/MAP3K7 binding protein 1	-1.692	-0.758	0.0001664	0.003423			Reps1	Reps1Reps1	RalBP1 associated Eps domain containing protein	-1.931	-0.95	6.48e-05	0.0008603
Ccl12	Ccl12Ccl12	chemokine (C-C motif) ligand 12	-2.66	-1.411	0.0001689	0.003423			Ecsit	EcsitEcsit	ECSIT signalling integrator	-1.965	-0.975	9.017e-05	0.001089
Mapk8	Mapk8Mapk8	mitogen-activated protein kinase 8	-1.629	-0.704	0.0002274	0.004347			Tirap	TirapTirap	toll-interleukin 1 receptor (TIR) domain-containing adaptor protein	-1.736	-0.796	9.272e-05	0.001098
Atg12	Atg12Atg12	autophagy related 12	-1.628	-0.703	0.0002314	0.004347			Ccl12	Ccl12Ccl12	chemokine (C-C motif) ligand 12	-2.776	-1.473	0.00014	0.001562
Fadd	FaddFadd	Fas (TNFRSF6)-associated via death domain	-1.851	-0.888	0.0002372	0.004348			Icosl	IcoslIcosl	icos ligand	-1.884	-0.913	0.0001681	0.001823
Reps1	Reps1Reps1	RalBP1 associated Eps domain containing protein	-1.779	-0.831	0.0002909	0.00509			Mapk1	Mapk1Mapk1	mitogen-activated protein kinase 1	-1.795	-0.844	0.0002032	0.002143
Tnfsf10	Tnfsf10Tnfsf10	tumor necrosis factor (ligand) superfamily, member 10	-2.049	-1.035	0.0003808	0.006312			Lilra5	Lilra5Lilra5	leukocyte immunoglobulin-like receptor, subfamily A (with TM domain), member 5	-3.744	-1.905	0.0002146	0.002233
H2-K1	H2-K1H2-K1	histocompatibility 2, K1, K region	-1.977	-0.983	0.0004315	0.006781			Eif2b4	Eif2b4Eif2b4	eukaryotic translation initiation factor 2B, subunit 4 delta	-2.247	-1.168	0.0002188	0.002247
Tollip	TollipTollip	toll interacting protein	-1.418	-0.504	0.0004771	0.007257			Ilf3	Ilf3Ilf3	interleukin enhancer binding factor 3	-2.426	-1.278	0.0002842	0.002806
Abcf1	Abcf1Abcf1	ATP-binding cassette, sub-family F (GCN20), member 1	-1.952	-0.965	0.0004965	0.007352			Hmgb1	Hmgb1Hmgb1	high mobility group box 1	-2.412	-1.27	0.000345	0.003321
Pdgfrb	PdgfrbPdgfrb	platelet derived growth factor receptor, beta polypeptide	-2.441	-1.287	0.0005318	0.007583			Pou2f2	Pou2f2Pou2f2	POU domain, class 2, transcription factor 2	-2.232	-1.158	0.0004459	0.004087
Runx3	Runx3Runx3	runt related transcription factor 3	-3.151	-1.656	0.000735	0.008902			Nfkb1	Nfkb1Nfkb1	nuclear factor of kappa light polypeptide gene enhancer in B cells 1, p105	-1.788	-0.838	0.0005298	0.004744
Edc3	Edc3Edc3	enhancer of mRNA decapping 3	-1.551	-0.633	0.0008574	0.01016			Hdac3	Hdac3Hdac3	histone deacetylase 3	-1.792	-0.841	0.0005679	0.005026
Eif2b4	Eif2b4Eif2b4	eukaryotic translation initiation factor 2B, subunit 4 delta	-2.013	-1.009	0.0009334	0.01069			Vegfa	VegfaVegfa	vascular endothelial growth factor A	-2.834	-1.503	0.000754	0.00638
Ncr1	Ncr1Ncr1	natural cytotoxicity triggering receptor 1	-2.448	-1.292	0.0009437	0.01069			Sigirr	SigirrSigirr	single immunoglobulin and toll-interleukin 1 receptor (TIR) domain	-1.727	-0.788	0.0008768	0.007
Il1r1	Il1r1Il1r1	interleukin 1 receptor, type I	-2.609	-1.384	0.001005	0.01121			Tollip	TollipTollip	toll interacting protein	-1.404	-0.49	0.0009468	0.007364
Axl	AxlAxl	AXL receptor tyrosine kinase	-1.993	-0.995	0.001053	0.01149			Rps6	Rps6Rps6	ribosomal protein S6	-1.675	-0.745	0.001028	0.007806
Vim	VimVim	vimentin	-1.897	-0.924	0.001074	0.01149			Abcf1	Abcf1Abcf1	ATP-binding cassette, sub-family F (GCN20), member 1	-1.907	-0.931	0.001055	0.00789
Itga1	Itga1Itga1	integrin alpha 1	-2.424	-1.278	0.001185	0.01201			Hck	HckHck	hemopoietic cell kinase	-1.982	-0.987	0.001072	0.007931
Irak1	Irak1Irak1	interleukin-1 receptor-associated kinase 1	-1.433	-0.519	0.001756	0.01606			Mapkapk2	Mapkapk2Mapkapk2	MAP kinase-activated protein kinase 2	-1.723	-0.785	0.001173	0.008442
Rela	RelaRela	v-rel reticuloendotheliosis viral oncogene homolog A (avian)	-1.896	-0.923	0.002221	0.01924			Rela	RelaRela	v-rel reticuloendotheliosis viral oncogene homolog A (avian)	-2.006	-1.005	0.001257	0.008963
Mif	MifMif	macrophage migration inhibitory factor (glycosylation-inhibiting factor)	-3.139	-1.65	0.00226	0.01924			Ikzf2	Ikzf2Ikzf2	IKAROS family zinc finger 2	-1.866	-0.9	0.001386	0.009586
Pvr	PvrPvr	poliovirus receptor	-2.051	-1.037	0.002274	0.01924			Stat3	Stat3Stat3	signal transducer and activator of transcription 3	-1.585	-0.664	0.001394	0.009586
H2-M3	H2-M3H2-M3	histocompatibility 2, M region locus 3	-1.622	-0.697	0.002372	0.01964			Pvr	PvrPvr	poliovirus receptor	-2.168	-1.116	0.001445	0.009844
Tnfsf13b	Tnfsf13bTnfsf13b	tumor necrosis factor (ligand) superfamily, member 13b	-2.238	-1.162	0.00249	0.02009			Clu	CluClu	clusterin	-3.726	-1.898	0.00154	0.01031
Tnfsf8	Tnfsf8Tnfsf8	tumor necrosis factor (ligand) superfamily, member 8	-2.048	-1.034	0.002505	0.02009			Tnfsf13b	Tnfsf13bTnfsf13b	tumor necrosis factor (ligand) superfamily, member 13b	-2.375	-1.248	0.001642	0.01071
Cxcr4	Cxcr4Cxcr4	chemokine (C-X-C motif) receptor 4	-1.938	-0.955	0.002532	0.0201			Ncr1	Ncr1Ncr1	natural cytotoxicity triggering receptor 1	-2.387	-1.255	0.00176	0.0112
Gusb	GusbGusb	glucuronidase, beta	-1.404	-0.489	0.002565	0.02015			Il6st	Il6stIl6st	interleukin 6 signal transducer	-1.941	-0.957	0.001799	0.01123
Nfkb1	Nfkb1Nfkb1	nuclear factor of kappa light polypeptide gene enhancer in B cells 1, p105	-1.621	-0.697	0.002801	0.02157			Dusp6	Dusp6Dusp6	dual specificity phosphatase 6	-1.867	-0.901	0.001842	0.01135
Mapk1	Mapk1Mapk1	mitogen-activated protein kinase 1	-1.561	-0.642	0.003211	0.02401			Ppia	PpiaPpia	peptidylprolyl isomerase A	-1.845	-0.884	0.002143	0.01279
Il9	Il9Il9	interleukin 9	-2.225	-1.154	0.003272	0.02407			Jak1	Jak1Jak1	Janus kinase 1	-1.333	-0.414	0.002143	0.01279
Vegfa	VegfaVegfa	vascular endothelial growth factor A	-2.404	-1.266	0.003282	0.02407			Smn1	Smn1Smn1	survival motor neuron 1	-1.873	-0.905	0.002171	0.01286
Mapk3	Mapk3Mapk3	mitogen-activated protein kinase 3	-1.893	-0.921	0.003408	0.02466			Egr2	Egr2Egr2	early growth response 2	-2.069	-1.049	0.002235	0.01314
Vhl	VhlVhl	von Hippel-Lindau tumor suppressor	-2.155	-1.108	0.003537	0.025			Fap	FapFap	fibroblast activation protein	-2.893	-1.533	0.002274	0.01327
Fap	FapFap	fibroblast activation protein	-2.646	-1.404	0.003912	0.02642			Creb1	Creb1Creb1	cAMP responsive element binding protein 1	-1.457	-0.543	0.00243	0.01407
Il10	Il10Il10	interleukin 10	-1.764	-0.819	0.00412	0.02747			Atg12	Atg12Atg12	autophagy related 12	-1.501	-0.586	0.002604	0.01485
Cd81	Cd81Cd81	CD81 antigen	-1.541	-0.624	0.004736	0.03014			Itgax	ItgaxItgax	integrin alpha X	-2.486	-1.314	0.002976	0.01637
Notch1	Notch1Notch1	notch 1	-1.66	-0.731	0.00541	0.03399			Cxcr4	Cxcr4Cxcr4	chemokine (C-X-C motif) receptor 4	-1.937	-0.954	0.003365	0.01825
Tubb5	Tubb5Tubb5	tubulin, beta 5 class I	-3.076	-1.621	0.006144	0.03725			Ncam1	Ncam1Ncam1	neural cell adhesion molecule 1	-2.393	-1.259	0.00387	0.02084
Ppia	PpiaPpia	peptidylprolyl isomerase A	-1.692	-0.758	0.006428	0.03837			Xcl1	Xcl1Xcl1	chemokine (C motif) ligand 1	-2.703	-1.434	0.004083	0.02168
Cd7	Cd7Cd7	CD7 antigen	-1.849	-0.887	0.006705	0.03941			Il13ra1	Il13ra1Il13ra1	interleukin 13 receptor, alpha 1	-1.41	-0.496	0.005324	0.02727
Ilf3	Ilf3Ilf3	interleukin enhancer binding factor 3	-1.876	-0.907	0.007168	0.04119			Notch1	Notch1Notch1	notch 1	-1.686	-0.754	0.005364	0.02727
Tgfb2	Tgfb2Tgfb2	transforming growth factor, beta 2	-2.465	-1.302	0.007347	0.04129			Ddx58	Ddx58Ddx58	DEAD (Asp-Glu-Ala-Asp) box polypeptide 58	-1.971	-0.979	0.005418	0.02727
C1qb	C1qbC1qb	complement component 1, q subcomponent, beta polypeptide	-1.856	-0.892	0.007679	0.04254			Bmi1	Bmi1Bmi1	Bmi1 polycomb ring finger oncogene	-1.52	-0.605	0.00546	0.0273
Anp32b	Anp32bAnp32b	acidic (leucine-rich) nuclear phosphoprotein 32 family, member B	-2.639	-1.4	0.007812	0.04266			Usp18	Usp18Usp18	ubiquitin specific peptidase 18	-1.838	-0.878	0.00582	0.02891
Anxa1	Anxa1Anxa1	annexin A1	-1.867	-0.9	0.009104	0.04801			Itga6	Itga6Itga6	integrin alpha 6	-1.581	-0.661	0.006105	0.03005
Psen2	Psen2Psen2	presenilin 2	-1.305	-0.385	0.009409	0.04909			Vim	VimVim	vimentin	-1.73	-0.791	0.00616	0.03005
Psma2	Psma2Psma2	proteasome (prosome, macropain) subunit, alpha type 2	-1.504	-0.589	0.009436	0.04909			Mmp9	Mmp9Mmp9	matrix metallopeptidase 9	-3.59	-1.844	0.006357	0.03078
Xbp1	Xbp1Xbp1	X-box binding protein 1	-1.33	-0.412	0.01001	0.05107			Lif	LifLif	leukemia inhibitory factor	-1.902	-0.928	0.006682	0.03216
Inpp5d	Inpp5dInpp5d	inositol polyphosphate-5-phosphatase D	-1.527	-0.611	0.01081	0.05442			Tnfrsf13c	Tnfrsf13cTnfrsf13c	tumor necrosis factor receptor superfamily, member 13c	-2.198	-1.136	0.007055	0.03374
Il34	Il34Il34	interleukin 34	-1.916	-0.938	0.01155	0.05699			Klra17	Klra17Klra17	killer cell lectin-like receptor, subfamily A, member 17	-3.107	-1.635	0.007449	0.03519
Tnfrsf10b	Tnfrsf10bTnfrsf10b	tumor necrosis factor receptor superfamily, member 10b	-2.173	-1.119	0.01241	0.06011			Anp32b	Anp32bAnp32b	acidic (leucine-rich) nuclear phosphoprotein 32 family, member B	-2.722	-1.445	0.0077	0.03613
Cd4	Cd4Cd4	CD4 antigen	-2.116	-1.081	0.0128	0.0616			Tnfsf8	Tnfsf8Tnfsf8	tumor necrosis factor (ligand) superfamily, member 8	-1.911	-0.934	0.007742	0.03613
Birc5	Birc5Birc5	baculoviral IAP repeat-containing 5	-3.897	-1.962	0.01322	0.06282			Birc5	Birc5Birc5	baculoviral IAP repeat-containing 5	-4.511	-2.173	0.00783	0.03632
Nefl	NeflNefl	neurofilament, light polypeptide	-2.164	-1.114	0.01408	0.06569			Eef1g	Eef1gEef1g	eukaryotic translation elongation factor 1 gamma	-2.002	-1.002	0.00796	0.0367
Smn1	Smn1Smn1	survival motor neuron 1	-1.622	-0.697	0.01423	0.06581			Tubb5	Tubb5Tubb5	tubulin, beta 5 class I	-3.046	-1.607	0.008286	0.03798
Siglec1	Siglec1Siglec1	sialic acid binding Ig-like lectin 1, sialoadhesin	-1.9	-0.926	0.01427	0.06581			Psma2	Psma2Psma2	proteasome (prosome, macropain) subunit, alpha type 2	-1.531	-0.614	0.008583	0.03865
Ifi27	Ifi27Ifi27	interferon, alpha-inducible protein 27	-1.53	-0.614	0.01473	0.06749			Smad4	Smad4Smad4	SMAD family member 4	-1.635	-0.71	0.008742	0.03891
Bcl10	Bcl10Bcl10	B cell leukemia/lymphoma 10	-1.664	-0.735	0.01487	0.06755			Mif	MifMif	macrophage migration inhibitory factor (glycosylation-inhibiting factor)	-2.729	-1.448	0.008859	0.0392
Tlr7	Tlr7Tlr7	toll-like receptor 7	-1.538	-0.621	0.01494	0.06755			Tnfsf10	Tnfsf10Tnfsf10	tumor necrosis factor (ligand) superfamily, member 10	-1.709	-0.773	0.009043	0.03979
C8b	C8bC8b	complement component 8, beta polypeptide	-1.916	-0.938	0.015	0.06755			Runx3	Runx3Runx3	runt related transcription factor 3	-2.464	-1.301	0.00924	0.04027
Il6st	Il6stIl6st	interleukin 6 signal transducer	-1.622	-0.698	0.01799	0.07897			Rrad	RradRrad	Ras-related associated with diabetes	-1.769	-0.823	0.009561	0.04136
Stat3	Stat3Stat3	signal transducer and activator of transcription 3	-1.388	-0.473	0.018	0.07897			Anxa1	Anxa1Anxa1	annexin A1	-1.886	-0.915	0.01001	0.0428
Atg5	Atg5Atg5	autophagy related 5	-1.951	-0.964	0.01841	0.07902			Il34	Il34Il34	interleukin 34	-1.974	-0.981	0.01032	0.04389
Rrad	RradRrad	Ras-related associated with diabetes	-1.65	-0.722	0.01881	0.07968			Il12b	Il12bIl12b	interleukin 12b	-2.225	-1.154	0.01087	0.046
Sigirr	SigirrSigirr	single immunoglobulin and toll-interleukin 1 receptor (TIR) domain	-1.442	-0.528	0.0202	0.08277			Oaz1	Oaz1Oaz1	ornithine decarboxylase antizyme 1	-1.663	-0.733	0.0111	0.04672
Egr2	Egr2Egr2	early growth response 2	-1.701	-0.766	0.02034	0.08277			Axl	AxlAxl	AXL receptor tyrosine kinase	-1.713	-0.777	0.01214	0.0497
Tnfrsf9	Tnfrsf9Tnfrsf9	tumor necrosis factor receptor superfamily, member 9	-2.028	-1.02	0.0204	0.08277			Vhl	VhlVhl	von Hippel-Lindau tumor suppressor	-1.958	-0.97	0.01268	0.05141
Hdac3	Hdac3Hdac3	histone deacetylase 3	-1.456	-0.542	0.02041	0.08277			Isg20	Isg20Isg20	interferon-stimulated protein	-1.735	-0.795	0.013	0.0519
Cklf	CklfCklf	chemokine-like factor	-1.993	-0.995	0.02053	0.08277			Bcl10	Bcl10Bcl10	B cell leukemia/lymphoma 10	-1.704	-0.769	0.01335	0.053
Hmgb1	Hmgb1Hmgb1	high mobility group box 1	-1.716	-0.779	0.02142	0.08592			Myd88	Myd88Myd88	myeloid differentiation primary response gene 88	-1.637	-0.711	0.01441	0.05634
Snai1	Snai1Snai1	snail family zinc finger 1	-3.135	-1.649	0.02222	0.08867			Itgb1	Itgb1Itgb1	integrin beta 1 (fibronectin receptor beta)	-1.555	-0.637	0.01465	0.05697
Ncam1	Ncam1Ncam1	neural cell adhesion molecule 1	-1.923	-0.944	0.02464	0.09582			C8b	C8bC8b	complement component 8, beta polypeptide	-1.94	-0.956	0.01603	0.06173
Ifnar1	Ifnar1Ifnar1	interferon (alpha and beta) receptor 1	-1.331	-0.412	0.02493	0.09646			St6gal1	St6gal1St6gal1	beta galactoside alpha 2,6 sialyltransferase 1	-1.908	-0.932	0.01632	0.06251
Rps6	Rps6Rps6	ribosomal protein S6	-1.398	-0.484	0.02605	0.0979			Ythdf2	Ythdf2Ythdf2	YTH domain family 2	-1.578	-0.658	0.01711	0.06517
Cd83	Cd83Cd83	CD83 antigen	-2.064	-1.045	0.02606	0.0979			Igf1r	Igf1rIgf1r	insulin-like growth factor I receptor	-2.145	-1.101	0.01784	0.06733
Oaz1	Oaz1Oaz1	ornithine decarboxylase antizyme 1	-1.538	-0.621	0.02621	0.09798			Sbno2	Sbno2Sbno2	strawberry notch homolog 2 (Drosophila)	-1.528	-0.612	0.01957	0.07352
Mmp9	Mmp9Mmp9	matrix metallopeptidase 9	-2.701	-1.434	0.02797	0.104			Snai1	Snai1Snai1	snail family zinc finger 1	-3.319	-1.731	0.01983	0.07411
Sbno2	Sbno2Sbno2	strawberry notch homolog 2 (Drosophila)	-1.47	-0.556	0.02865	0.1055			Mapk3	Mapk3Mapk3	mitogen-activated protein kinase 3	-1.677	-0.746	0.02028	0.07542
Ddx58	Ddx58Ddx58	DEAD (Asp-Glu-Ala-Asp) box polypeptide 58	-1.673	-0.742	0.02884	0.1057			Casp3	Casp3Casp3	caspase 3	-1.952	-0.965	0.02077	0.07691
Itgax	ItgaxItgax	integrin alpha X	-1.901	-0.927	0.02944	0.1071			Cd207	Cd207Cd207	CD207 antigen	-1.837	-0.877	0.02321	0.0847
Psmb10	Psmb10Psmb10	proteasome (prosome, macropain) subunit, beta type 10	-2.014	-1.01	0.02957	0.1071			Csf3	Csf3Csf3	colony stimulating factor 3 (granulocyte)	-6.329	-2.662	0.02354	0.08552
Myd88	Myd88Myd88	myeloid differentiation primary response gene 88	-1.529	-0.612	0.02962	0.1071			Crebbp	CrebbpCrebbp	CREB binding protein	-1.385	-0.47	0.0243	0.08702
Usp18	Usp18Usp18	ubiquitin specific peptidase 18	-1.585	-0.664	0.03061	0.1084			Il1b	Il1bIl1b	interleukin 1 beta	-4.185	-2.065	0.02476	0.08828
Eef1g	Eef1gEef1g	eukaryotic translation elongation factor 1 gamma	-1.727	-0.788	0.03063	0.1084			Cd276	Cd276Cd276	CD276 antigen	-1.728	-0.789	0.02639	0.09364
Map2k1	Map2k1Map2k1	mitogen-activated protein kinase kinase 1	-1.506	-0.59	0.03064	0.1084			Tnfrsf10b	Tnfrsf10bTnfrsf10b	tumor necrosis factor receptor superfamily, member 10b	-2.024	-1.017	0.02688	0.09452
Cx3cl1	Cx3cl1Cx3cl1	chemokine (C-X3-C motif) ligand 1	-1.861	-0.896	0.03114	0.1095			Il9	Il9Il9	interleukin 9	-1.84	-0.879	0.02814	0.09679
Klra17	Klra17Klra17	killer cell lectin-like receptor, subfamily A, member 17	-2.41	-1.269	0.0315	0.1103			Cd63	Cd63Cd63	CD63 antigen	-1.512	-0.597	0.02832	0.09679
Ly86	Ly86Ly86	lymphocyte antigen 86	-1.747	-0.805	0.03182	0.1109			Tfrc	TfrcTfrc	transferrin receptor	-1.712	-0.776	0.0285	0.09679
Itgb1	Itgb1Itgb1	integrin beta 1 (fibronectin receptor beta)	-1.452	-0.538	0.03305	0.1146			C8a	C8aC8a	complement component 8, alpha polypeptide	-1.902	-0.928	0.02853	0.09679
Cd3eap	Cd3eapCd3eap	CD3E antigen, epsilon polypeptide associated protein	-2.291	-1.196	0.03501	0.1198			Cd34	Cd34Cd34	CD34 antigen	-1.884	-0.914	0.02951	0.0988
Il12b	Il12bIl12b	interleukin 12b	-1.885	-0.914	0.03676	0.1247			Nfkb2	Nfkb2Nfkb2	nuclear factor of kappa light polypeptide gene enhancer in B cells 2, p49/p100	-2.07	-1.05	0.03076	0.1022
Tnfrsf13b	Tnfrsf13bTnfrsf13b	tumor necrosis factor receptor superfamily, member 13b	-1.596	-0.674	0.0382	0.129			Il7	Il7Il7	interleukin 7	-2.169	-1.117	0.03081	0.1022
Abl1	Abl1Abl1	c-abl oncogene 1, non-receptor tyrosine kinase	-1.713	-0.776	0.04011	0.1343			Sf3a3	Sf3a3Sf3a3	splicing factor 3a, subunit 3	-1.86	-0.895	0.03096	0.1023
Sf3a3	Sf3a3Sf3a3	splicing factor 3a, subunit 3	-1.771	-0.824	0.04045	0.1346			Il6	Il6Il6	interleukin 6	-3.144	-1.653	0.03246	0.1067
Cd63	Cd63Cd63	CD63 antigen	-1.453	-0.539	0.04101	0.1355			H2-K1	H2-K1H2-K1	histocompatibility 2, K1, K region	-1.52	-0.604	0.03258	0.1067
Tfe3	Tfe3Tfe3	transcription factor E3	-1.363	-0.447	0.04135	0.1361			Oasl1	Oasl1Oasl1	2'-5' oligoadenylate synthetase-like 1	-1.86	-0.896	0.03313	0.1077
H2-Ob	H2-ObH2-Ob	histocompatibility 2, O region beta locus	-2.088	-1.062	0.04293	0.1401			Pvrl2	Nectin2Nectin2	nectin cell adhesion molecule 2	-1.447	-0.533	0.03426	0.1095
Mapkapk2	Mapkapk2Mapkapk2	MAP kinase-activated protein kinase 2	-1.382	-0.467	0.04374	0.1409			Nup107	Nup107Nup107	nucleoporin 107	-1.7	-0.766	0.03544	0.1123
Mapk11	Mapk11Mapk11	mitogen-activated protein kinase 11	-1.661	-0.732	0.04551	0.1447			Ifnar1	Ifnar1Ifnar1	interferon (alpha and beta) receptor 1	-1.317	-0.397	0.03579	0.1126
Bst2	Bst2Bst2	bone marrow stromal cell antigen 2	-1.664	-0.735	0.04567	0.1447			C1qbp	C1qbpC1qbp	complement component 1, q subcomponent binding protein	-1.641	-0.715	0.03636	0.1126
Cr2	Cr2Cr2	complement receptor 2	-1.494	-0.58	0.04641	0.1465			Il19	Il19Il19	interleukin 19	-2.042	-1.03	0.03647	0.1126
Jak3	Jak3Jak3	Janus kinase 3	-1.556	-0.638	0.04692	0.1474			Il1r2	Il1r2Il1r2	interleukin 1 receptor, type II	-2.372	-1.246	0.03656	0.1126
Irf2	Irf2Irf2	interferon regulatory factor 2	-1.358	-0.441	0.04709	0.1474			Igll1	Igll1Igll1	immunoglobulin lambda-like polypeptide 1	-1.61	-0.688	0.03683	0.1129
Ythdf2	Ythdf2Ythdf2	YTH domain family 2	-1.443	-0.529	0.04772	0.1488			Map2k1	Map2k1Map2k1	mitogen-activated protein kinase kinase 1	-1.502	-0.586	0.03694	0.1129
Il7	Il7Il7	interleukin 7	-1.98	-0.985	0.04938	0.1527			H2-M3	H2-M3H2-M3	histocompatibility 2, M region locus 3	-1.4	-0.485	0.038	0.1156
Map3k1	Map3k1Map3k1	mitogen-activated protein kinase kinase kinase 1	-1.455	-0.541	0.04978	0.1533			Sdha	SdhaSdha	succinate dehydrogenase complex, subunit A, flavoprotein (Fp)	-1.748	-0.805	0.04032	0.1217
									Irf2	Irf2Irf2	interferon regulatory factor 2	-1.384	-0.469	0.04072	0.1225
									Mapk11	Mapk11Mapk11	mitogen-activated protein kinase 11	-1.682	-0.75	0.04674	0.1395
									Il27	Il27Il27	interleukin 27	-1.566	-0.647	0.04691	0.1395
									Cx3cl1	Cx3cl1Cx3cl1	chemokine (C-X3-C motif) ligand 1	-1.797	-0.846	0.04786	0.1417
									Fn1	Fn1Fn1	fibronectin 1	-1.634	-0.709	0.04815	0.1421

## Sheet: Day 9 up genes pathways
OP versus vehicle day 9 - upregulated genes											TOP versus vehicle day 9 - upregulated genes
Kegg pathway enrichment											Kegg pathway enrichment
Name	Significant genes	S	N	S/N (%)	OR	Z-score	P	P (adj.)			Name	Significant genes	S	N	S/N (%)	OR	Z-score	P	P (adj.)
Natural killer cell mediated cytotoxicity	Cd247, Cd48, Fasl, Fcgr4, Gzmb, H2-T23, Hcst, Ifng, Itgb2, Klrc1, [...]	20	58	34.48	3.31	2.626	0.0001467	0.01335			T cell receptor signaling pathway	Cd247, Cd3d, Cd3e, Cd3g, Cd8a, Cd8b1, Fos, Icos, Ifng, Il4, [...]	14	47	29.79	2.41	2.042	0.01054	0.6031
T cell receptor signaling pathway	Card11, Cd247, Cd28, Cd3d, Cd3e, Cd3g, Cd8a, Cd8b1, Ctla4, Icos, [...]	16	47	34.04	3.13	2.334	0.0008996	0.04093			Natural killer cell mediated cytotoxicity	Cd247, Cd48, Fasl, Gzmb, Icam1, Ifng, Klrc1, Klrc2, Klrd1, Klrk1, [...]	15	58	25.86	1.96	1.97	0.03114	0.6031
Cell adhesion molecules (CAMs)	Cd2, Cd22, Cd274, Cd28, Cd6, Cd80, Cd8a, Cd8b1, Ctla4, H2-T23, [...]	17	60	28.33	2.37	2.195	0.006031	0.1829			Salivary secretion	Bst1, Cd38, Lyz2	3	5	60	8.03	1.342	0.03165	0.6031
Salivary secretion	Bst1, Cd38, Lyz2	3	5	60	8.33	1.342	0.02915	0.5925			African trypanosomiasis	Fasl, Icam1, Ido1, Ifng, Il12a, Tnf	6	17	35.29	2.96	1.455	0.04108	0.6031
OP versus vehicle day 9 - upregulated genes											TOP versus vehicle day 9 - upregulated genes
GO enrichment											GO enrichment
Ontology	Name	Significant genes	S	N	S/N (%)	OR	Z-score	P	P (adj.)		Ontology	Name	Significant genes	S	N	S/N (%)	OR	Z-score	P	P (adj.)
CC	integral component of membrane	Abca1, Abcg1, Bax, Ctla4, Cd1d1, Cd2, Cd22, Cd28, Cd36, Cd37, [...]	55	213	25.82	2.97	4.111	7.905e-07	0.0005119		CC	integral component of membrane	Abca1, Abcg1, Bax, Bcl2l1, Ctla4, Cd1d1, Cd2, Cd22, Cd36, Cd37, [...]	59	213	27.7	2.78	4.659	1.37e-06	0.001339
BP	leukocyte aggregation	Bax, Ctla4, Cd1d1, Cd2, Cd28, Cd3d, Cd3e, Cd48, Cd5, Cd6, [...]	46	174	26.44	2.94	3.336	1.102e-06	0.0005119		CC	membrane part	Abca1, Abcg1, Apoe, Bax, Bcl2l1, Bst1, Btk, Ctla4, Cd1d1, Cd2, [...]	31	105	29.52	3.78	8.198	2.67e-06	0.001339
BP	T cell aggregation	Bax, Ctla4, Cd1d1, Cd2, Cd28, Cd3d, Cd3e, Cd48, Cd5, Cd6, [...]	38	141	26.95	3.03	3.705	3.352e-06	0.001038		BP	T cell aggregation	Bax, Ctla4, Cd1d1, Cd2, Cd3d, Cd3e, Cd48, Cd5, Cd6, Cd80, [...]	42	141	29.79	2.69	3.79	1.066e-05	0.003565
CC	membrane part	Abca1, Abcg1, Apoe, Bax, Bst1, Ctla4, Cd1d1, Cd2, Cd22, Cd28, [...]	25	105	23.81	3.47	7.124	4.719e-05	0.01021		BP	leukocyte aggregation	Bax, Ctla4, Cd1d1, Cd2, Cd3d, Cd3e, Cd48, Cd5, Cd6, Cd80, [...]	48	174	27.59	2.41	3.411	2.865e-05	0.007184
CC	immunological synapse	Cd28, Cd37, Cd3e, Cd6, Lck, Lgals3, Zap70, Card11, Havcr2	9	15	60	9.38	2.066	5.496e-05	0.01021		BP	hemopoiesis	Bax, Btk, Ctla4, Cd1d1, Cd3d, Cd3e, Cd8a, Eomes, Fos, Fut7, [...]	19	50	38	3.12	4.525	0.0004304	0.08633
CC	external side of plasma membrane	Abca1, Abcg1, Apoe, Ctla4, Cd1d1, Cd2, Cd22, Cd28, Cd36, Cd3e, [...]	37	145	25.52	2.52	2.824	6.599e-05	0.01022		CC	alpha-beta T cell receptor complex	Cd3d, Cd3e, Cd3g, Cd247	4	4	100	0	2	0.0007654	0.1114
BP	T cell costimulation	Cd28, Cd3e, Cd5, Cd80, Dpp4, Tnfsf14, Icos, Cd274, Card11	9	16	56.25	8.19	2.25	9.682e-05	0.01285		BP	plasma lipoprotein particle organization	Abca1, Abcg1, Apoe, Mpo	4	4	100	0	2	0.0007777	0.1114
BP	immune response-activating cell surface receptor s...	Bax, Ctla4, Cd28, Cd38, Cd3e, Cd247, Ifng, Itk, Lck, Lgals3, [...]	16	46	34.78	3.52	2.212	0.0002936	0.0341		BP	leukocyte activation	Bax, Bst1, Btk, Ctla4, Cd1d1, Cd2, Cd37, Cd38, Cd3d, Cd3e, [...]	14	44	31.82	3.19	8.895	0.001552	0.188
BP	regulation of lymphocyte activation	Bst1, Ctla4, Cd1d1, Cd28, Cd38, Cd3e, Cd5, Cd6, Cd80, Cdkn1a, [...]	10	24	41.67	5.14	7.144	0.0004289	0.03985		MF	hydrolase activity, acting on glycosyl bonds	Bst1, Cd38, Chil3, Fut7, Lyz2	5	7	71.43	13.21	1.89	0.001771	0.188
CC	alpha-beta T cell receptor complex	Cd3d, Cd3e, Cd3g, Cd247	4	4	100	0	2	0.0004456	0.03985		BP	regulation of plasma lipoprotein particle levels	Abca1, Abcg1, Apoe, Cd36, Mpo	5	7	71.43	12.79	1.89	0.002003	0.188
BP	positive regulation of calcium-mediated signaling	Cd3e, Cd8a, Fcer1a, Ccl4, Syk, Zap70, Trem2	7	12	58.33	8.77	2.021	0.0004719	0.03985		BP	T cell costimulation	Cd3e, Cd5, Cd80, Dpp4, Ccl19, Tnfsf14, Icos, Cd274	8	16	50	5.19	2	0.002061	0.188
BP	lymphocyte differentiation	Bax, Ctla4, Cd1d1, Cd28, Cd3d, Cd3e, Cd8a, Eomes, Ifng, Il18r1, [...]	18	63	28.57	2.61	2.898	0.002047	0.1584		BP	positive regulation of cholesterol efflux	Abca1, Abcg1, Apoe, Lrp1	4	5	80	20.33	1.789	0.003377	0.2359
MF	cholesterol transporter activity	Abca1, Abcg1, Apoe	3	3	100	0	1.732	0.002915	0.1965		BP	positive regulation of sterol transport	Abca1, Abcg1, Apoe, Lrp1	4	5	80	20.33	1.789	0.003377	0.2359
BP	reverse cholesterol transport	Abca1, Abcg1, Apoe	3	3	100	0	1.732	0.002962	0.1965		BP	calcium ion transmembrane transport	Bax, Ccr5, Lck, Ptprc, Thy1, Ccl19	4	5	80	20.13	2.683	0.003486	0.2359
BP	adaptive immune response	Serping1, C1qa, C2, C3, Ctla4, Cd1d1, Cd28, Cd48, Cd84, Cd8a, [...]	12	39	30.77	3.1	5.284	0.00342	0.2118		BP	single-organism cellular localization	Abca1, Abcg1, Apoe, Bax, Bcl2l1, Btk, Cd36, Cd84, Cdkn1a, Ifng, [...]	6	11	54.55	6.32	6.03	0.004161	0.2359
BP	positive regulation of interleukin-2 biosynthetic ...	Cd1d1, Cd28, Cd3e, Irf4, Card11	5	9	55.56	7.69	1.667	0.004528	0.2629		MF	cholesterol transporter activity	Abca1, Abcg1, Apoe	3	3	100	0	1.732	0.004352	0.2359
BP	T cell receptor signaling pathway	Cd28, Cd3e, Cd247, Ifng, Itk, Lck, Lgals3, Thy1, Txk, Zap70	7	17	41.18	4.45	2.425	0.005529	0.2646		MF	cysteine-type endopeptidase inhibitor activity inv...	Bcl2l1, Cd27, Tnfsf14	3	3	100	0	1.732	0.004352	0.2359
BP	cell adhesion	Bax, Ctla4, Cd1d1, Cd2, Cd22, Cd28, Cd36, Cd3d, Cd3e, Cd48, [...]	23	111	20.72	2.14	5.125	0.00567	0.2646		BP	protein-lipid complex remodeling	Abcg1, Apoe, Mpo	3	3	100	0	1.732	0.004704	0.2359
MF	receptor activity	Abca1, Cd22, Cd36, Cd3d, Cd3e, Cd3g, Cd247, Cd48, Cd5, Cd6, [...]	32	153	20.92	1.9	2.83	0.005811	0.2646		BP	low-density lipoprotein particle remodeling	Abcg1, Apoe, Mpo	3	3	100	0	1.732	0.004704	0.2359
BP	CD4-positive, alpha-beta T cell activation	Ifng, Il18r1, Irf4, Ly9, Rora, Rorc, Batf	6	13	46.15	5.15	1.664	0.006604	0.2646		BP	reverse cholesterol transport	Abca1, Abcg1, Apoe	3	3	100	0	1.732	0.004704	0.2359

## Sheet: Day 9 down genes pathways
OP versus vehicle day 9 - downregulated genes											TOP versus vehicle day 9 - downregulated genes
Kegg pathway enrichment											Kegg pathway enrichment
Name	Significant genes	S	N	S/N (%)	OR	Z-score	P	P (adj.)			Name	Significant genes	S	N	S/N (%)	OR	Z-score	P	P (adj.)
MAPK signaling pathway	Atf2, Dusp4, Dusp6, Ecsit, Hras, Il1b, Il1r1, Map2k1, Mapk1, Mapk11, [...]	17	54	31.48	3.7	-2.313	0.0001255	0.01845			MAPK signaling pathway	Atf2, Dusp6, Ecsit, Il1r1, Map2k1, Map3k1, Mapk1, Mapk11, Mapk3, Mapk8, [...]	19	54	35.19	3.25	-2.586	0.000252	0.03957
Pancreatic cancer	Erbb2, Map2k1, Mapk1, Mapk8, Smad3, Smad4, Stat3, Tgfb2, Tgfb3, Tgfbr1, [...]	11	29	37.93	4.67	-2.043	0.0003843	0.02824			Pancreatic cancer	Map2k1, Mapk1, Mapk3, Mapk8, Nfkb1, Rela, Smad3, Stat3, Tgfb2, Tgfb3, [...]	12	29	41.38	4.04	-2.228	0.0007657	0.04855
Central carbon metabolism in cancer	Erbb2, Hif1a, Hras, Kit, Map2k1, Mapk1, Pdgfrb	7	16	43.75	5.72	-1.75	0.001892	0.05857			Cellular senescence	H2-K1, H2-M3, Map2k1, Mapk1, Mapk11, Mapk3, Mapkapk2, Myc, Nfkb1, Rela, [...]	14	39	35.9	3.23	-2.242	0.001479	0.04855
Pathways in cancer	Erbb2, Fadd, Hif1a, Hras, Itgb1, Kit, Map2k1, Mapk1, Mapk8, Pdgfrb, [...]	19	79	24.05	2.52	-2.138	0.002319	0.05857			FoxO signaling pathway	Atg12, Il10, Map2k1, Mapk1, Mapk11, Mapk3, Mapk8, Smad3, Stat3, Tgfb2, [...]	13	35	37.14	3.39	-2.197	0.001541	0.04855
FoxO signaling pathway	Hras, Map2k1, Mapk1, Mapk11, Mapk8, Smad3, Smad4, Stat3, Tgfb2, Tgfb3, [...]	11	35	31.43	3.46	-1.859	0.002397	0.05857			Colorectal cancer	Birc5, Map2k1, Mapk1, Mapk3, Mapk8, Myc, Smad3, Tgfb2, Tgfb3, Tgfbr1	10	24	41.67	4.02	-2.041	0.002069	0.04855
Signaling pathways regulating pluripotency of stem...	Hras, Lif, Map2k1, Mapk1, Mapk11, Smad3, Smad4, Stat3	8	21	38.1	4.55	-1.746	0.002551	0.05857			Relaxin signaling pathway	Atf2, Map2k1, Mapk1, Mapk11, Mapk3, Mapk8, Mmp9, Nfkb1, Rela, Smad3, [...]	12	32	37.5	3.41	-2.121	0.002161	0.04855
Proteoglycans in cancer	Cd44, Cd63, Erbb2, Hif1a, Hras, Itgb1, Map2k1, Mapk1, Mapk11, Rps6, [...]	13	46	28.26	3.01	-1.917	0.002789	0.05857			Chronic myeloid leukemia	Abl1, Map2k1, Mapk1, Mapk3, Myc, Nfkb1, Rela, Smad3, Tgfb2, Tgfb3, [...]	11	28	39.29	3.66	-2.079	0.002165	0.04855
Apelin signaling pathway	Hras, Map2k1, Mapk1, Rps6, Smad3, Smad4, Tgfbr1	7	18	38.89	4.66	-1.65	0.004237	0.07519			Signaling pathways regulating pluripotency of stem...	Il6st, Jak3, Map2k1, Mapk1, Mapk11, Mapk3, Myc, Smad3, Stat3	9	21	42.86	4.19	-1.964	0.002792	0.05033
Choline metabolism in cancer	Hif1a, Hras, Map2k1, Mapk1, Mapk8, Pdgfrb	6	14	42.86	5.45	-1.604	0.004681	0.07519			Neurotrophin signaling pathway	Abl1, Irak1, Map2k1, Map3k1, Mapk1, Mapk11, Mapk3, Mapk8, Mapkapk2, Nfkb1, [...]	12	33	36.36	3.24	-2.089	0.002939	0.05033
Chronic myeloid leukemia	Hras, Map2k1, Mapk1, Runx1, Smad3, Smad4, Tgfb2, Tgfb3, Tgfbr1	9	28	32.14	3.51	-1.701	0.005216	0.07519			Pathways in cancer	Abl1, Birc5, Csf1r, Cxcr4, Fadd, Itgb1, Map2k1, Mapk1, Mapk3, Mapk8, [...]	22	79	27.85	2.29	-2.475	0.003206	0.05033
OP versus vehicle day 9 - downregulated genes											TOP versus vehicle day 9 - downregulated genes
GO enrichment											GO enrichment
Ontology	Name	Significant genes	S	N	S/N (%)	OR	Z-score	P	P (adj.)		Ontology	Name	Significant genes	S	N	S/N (%)	OR	Z-score	P	P (adj.)
BP	in utero embryonic development	Angpt1, Prdm1, Runx1, Gpi1, Hif1a, Itgb1, Lif, Smad3, Smad4, Pdgfrb, [...]	10	21	47.62	7.3	-3.491	4.825e-05	0.0523		BP	in utero embryonic development	Angpt1, Prdm1, Runx1, Gpi1, Itgb1, Lif, Smad3, Smad4, Notch1, Pdgfrb, [...]	12	21	57.14	6.46	-3.491	5.768e-05	0.05926
BP	embryo development ending in birth or egg hatching	Angpt1, Prdm1, Runx1, Gpi1, Hif1a, Itgb1, Lif, Smad3, Smad4, Pdgfrb, [...]	17	55	30.91	3.56	-2.292	0.0001574	0.06319		BP	regulation of macromolecule metabolic process	Angpt1, Aire, Atf1, Atf2, Bcl10, Prdm1, C1qbp, Casp3, Runx1, Cd34, [...]	91	399	22.81	2.1	-4.756	0.0001414	0.05926
BP	regulation of transforming growth factor beta2 pro...	Atf2, Hif1a, Smad3, Smad4, Tgfb2	4	4	100	0	-2.5	0.0002307	0.06319		BP	muscle organ morphogenesis	Angpt1, Lif, Smad4, Notch1, Tgfb2, Tgfbr1, Dll4	7	9	77.78	16.38	-2.333	0.0001578	0.05926
BP	actomyosin structure organization	Itgb1, Smad3, Pdgfrb, Tgfb3, Tgfbr1	4	4	100	0	-2.5	0.0002332	0.06319		BP	cardiac muscle tissue morphogenesis	Angpt1, Smad4, Notch1, Tgfb2, Tgfbr1, Dll4	6	7	85.71	27.91	-2.268	0.0002056	0.05926
MF	growth factor activity	Gpi1, Cxcl1, Il12a, Il5, Il9, Lif, Osm, Tgfb2, Tgfb3, Vegfa	10	25	40	5.11	-2	0.000383	0.08302		CC	organelle	Angpt1, Aire, Alcam, Atf1, Atf2, Bcl10, Prdm1, C1qbp, Casp3, Runx1, [...]	72	300	24	2.26	-6.062	0.0002076	0.05926
BP	eye development	Prdm1, Hif1a, Hmgb1, Lif, Smad3, Pdgfrb, Stat3, Tgfb2, Tgfbr1, Vegfa, [...]	11	31	35.48	4.18	-1.976	0.0007143	0.1222		BP	embryo development ending in birth or egg hatching	Angpt1, Bcl10, Prdm1, Runx1, Gpi1, Itgb1, Lif, Smad3, Smad4, Mef2c, [...]	21	55	38.18	3.07	-2.832	0.0002478	0.05926
BP	coronary vasculature development	Angpt1, Prdm1, Pdgfrb, Tgfbr1, Vegfa, Tab1	4	5	80	29.44	-2.683	0.001015	0.1222		BP	neurogenesis	Alcam, Atf1, Prdm1, Casp3, Runx1, Cd44, Clu, Cxcr4, Cx3cr1, Erbb2, [...]	13	29	44.83	4.35	-7.056	0.0003162	0.06482
BP	regulation of transferase activity	Angpt1, Clu, Ccr7, Erbb2, Hras, Il1b, Irak1, Kit, Ltf, Pdgfrb, [...]	18	69	26.09	2.79	-2.528	0.001038	0.1222		CC	nucleus	Aire, Atf1, Atf2, Bcl10, Prdm1, C1qbp, Casp3, Runx1, Cd44, Chuk, [...]	56	222	25.23	1.95	-4.295	0.0006467	0.09973
BP	endocrine hormone secretion	Runx1, Il1b, Lif, Smad4	4	5	80	28.88	-1.789	0.001081	0.1222		BP	positive regulation of cell development	Atf1, C1qbp, Runx1, Cxcr4, Cx3cr1, Il1b, Il1r1, Il1rap, Il5, Itgb1, [...]	20	56	35.71	2.77	-2.94	0.0008574	0.09973
BP	regulation of intracellular signal transduction	Angpt1, C1qbp, Cd44, Clu, Ccr7, Erbb2, Hif1a, Hmgb1, Hras, Ifna1, [...]	5	9	55.56	10.42	-13	0.001486	0.1222		BP	ameboidal-type cell migration	Angpt1, C1qbp, Cd63, Cxcr4, Egr3, Fap, Hmgb1, Itgb1, Mmp9, Notch1, [...]	18	48	37.5	2.92	-2.598	0.0009396	0.09973
BP	positive regulation of kinase activity	Angpt1, Clu, Ccr7, Erbb2, Hras, Il1b, Irak1, Kit, Ltf, Pdgfrb, [...]	18	72	25	2.61	-2.121	0.001828	0.1222		BP	neuron fate commitment	Runx1, Smad4, Notch1, Tgfb2, Tgfbr1, Dll4	5	6	83.33	23.26	-2.449	0.0009665	0.09973
MF	mRNA binding	C1qbp, Rps6, Edc3	3	3	100	0	-1.732	0.001898	0.1222		CC	myelin sheath	Erbb2, Gpi1, Itgb1, Ncam1, Nefl, Ubc, Sdha, Jam3, Ppia	7	11	63.64	8.24	-2.714	0.0009872	0.09973
BP	peripheral nervous system development	Egr2, Egr3, Erbb2, Osm	3	3	100	0	-2.309	0.001906	0.1222		BP	positive regulation of neuroblast proliferation	Cx3cr1, Notch1, Cx3cl1, Vegfa, Vegfc	5	6	83.33	23.08	-2.041	0.0009951	0.09973
BP	contractile actin filament bundle assembly	Smad3, Tgfb3, Tgfbr1	3	3	100	0	-1.732	0.001953	0.1222		BP	ventricular cardiac muscle tissue development	Smad4, Notch1, Tgfb2, Tgfbr1, Dll4	5	6	83.33	23.08	-2.041	0.0009951	0.09973
BP	regulation of actin filament bundle assembly	Smad3, Tgfb3, Tgfbr1	3	3	100	0	-1.732	0.001953	0.1222		BP	actomyosin structure organization	Itgb1, Smad3, Mef2c, Pdgfrb, Tgfb3, Tgfbr1	4	4	100	0	-3	0.001042	0.09973
BP	positive regulation of filopodium assembly	Ccr7, Tgfb3, Tgfbr1	3	3	100	0	-1.732	0.001953	0.1222		BP	eye development	Prdm1, Hmgb1, Lif, Smad3, Pdgfrb, Stat3, Tgfb2, Tgfbr1, Twist1, Vegfa, [...]	13	31	41.94	3.45	-2.335	0.001552	0.1351
BP	positive regulation of stress fiber assembly	Smad3, Tgfb3, Tgfbr1	3	3	100	0	-1.732	0.001953	0.1222		BP	muscle cell proliferation	Angpt1, Il12b, Irak1, Jak2, Mef2c, Mmp9, Myc, Myd88, Ncam1, Notch1, [...]	17	46	36.96	2.84	-2.507	0.001601	0.1351
BP	mesoderm development	Gpi1, Smad3, Smad4, Vegfa, Ecsit	5	9	55.56	9.08	-1.667	0.002407	0.1222		BP	positive regulation of nervous system development	Atf1, Cxcr4, Cx3cr1, Il1b, Il1r1, Il1rap, Itgb1, Lif, Mef2c, Myc, [...]	18	51	35.29	2.66	-2.661	0.002057	0.164
BP	muscle organ morphogenesis	Angpt1, Lif, Smad4, Tgfb2, Tgfbr1	5	9	55.56	9.08	-1.667	0.002407	0.1222		CC	cytosol	Bcl10, C1qbp, Casp3, Chuk, Fadd, Gpi1, Hdac3, Jak2, Myd88, Nfkb1, [...]	27	89	30.34	2.17	-2.968	0.002294	0.1706
BP	reproductive system development	Angpt1, Prdm1, Runx1, Cd44, Hif1a, Kit, Lif, Smad4, Rps6, Tgfbr1, [...]	13	46	28.26	3	-1.917	0.002636	0.1222		BP	negative regulation of cell death	Angpt1, Bcl10, Casp3, Cd34, Cd44, Clu, Cx3cr1, Egr3, Erbb2, Fadd, [...]	32	115	27.83	2.04	-3.917	0.00248	0.1706

## Sheet: Day 17 up genes pathways
OP versus vehicle day 17 - upregulated genes												TOP versus vehicle day 17 - upregulated genes
Kegg pathway enrichment												Kegg pathway enrichment
	Name	Significant genes	S	N	S/N (%)	OR	Z-score	P	P (adj.)			Name	Significant genes	S	N	S/N (%)	OR	Z-score	P	P (adj.)
	T cell receptor signaling pathway	Cd247, Cd3d, Cd3e, Cd3g, Cd8a, Cd8b1, Fos, Icos, Ifng, Il4, [...]	14	47	29.79	2.41	2.042	0.01054	0.6031			T cell receptor signaling pathway	Cd247, Cd28, Cd3d, Cd3e, Cd3g, Cd8a, Cd8b1, Fos, Icos, Ifng, [...]	16	47	34.04	2.58	2.334	0.004516	0.411
	Natural killer cell mediated cytotoxicity	Cd247, Cd48, Fasl, Gzmb, Icam1, Ifng, Klrc1, Klrc2, Klrd1, Klrk1, [...]	15	58	25.86	1.96	1.97	0.03114	0.6031			Natural killer cell mediated cytotoxicity	Cd247, Cd48, Fasl, Fcgr4, Gzmb, Hcst, Icam1, Ifng, Itgb2, Klrc1, [...]	18	58	31.03	2.25	2.364	0.007981	0.411
	Salivary secretion	Bst1, Cd38, Lyz2	3	5	60	8.03	1.342	0.03165	0.6031			Salivary secretion	Bst1, Cd38, Lyz2	3	5	60	7	1.342	0.04292	0.6789
	African trypanosomiasis	Fasl, Icam1, Ido1, Ifng, Il12a, Tnf	6	17	35.29	2.96	1.455	0.04108	0.6031
OP versus vehicle day 17 - upregulated genes											TOP versus vehicle day 17 - upregulated genes
GO enrichment (top 10)											GO enrichment
	Ontology	Name	Significant genes	S	N	S/N (%)	OR	Z-score	P	P (adj.)		Ontology	Name	Significant genes	S	N	S/N (%)	OR	Z-score	P	P (adj.)
	CC	alpha-beta T cell receptor complex	Cd3d, Cd3e, Cd3g, Cd247	4	4	100	0	2	0.0005319	0.3233		CC	integral component of membrane	Abca1, Abcg1, C5ar1, Cd1d1, Cd2, Cd22, Cd28, Cd36, Cd37, Cd38, [...]	55	210	26.19	2.36	4.623	4.432e-05	0.03009
	BP	T cell costimulation	Cd3e, Cd5, Cd80, Ccl21a, Ccl19, Tnfsf14, Icos, Cd274	8	16	50	5.95	2	0.0009751	0.3233		BP	T cell costimulation	Cd28, Cd3e, Cd5, Cd80, Ccl21a, Tnfsf4, Ccl19, Tnfsf14, Icos, Cd274	9	14	64.29	9.54	2.673	7.691e-05	0.03009
	CC	membrane part	Abca1, Apoe, Bst1, C5ar1, Cd2, Cd36, Cd37, Cd38, Cd3d, Cd3e, [...]	25	105	23.81	2.36	6.539	0.002354	0.3233		CC	external side of plasma membrane	Abca1, Abcg1, Apoe, Cd1d1, Cd2, Cd22, Cd28, Cd36, Cd3e, Cd48, [...]	41	145	28.28	2.37	3.239	8.886e-05	0.03009
	BP	response to superoxide	Cd36, Mpo, Tnf	3	3	100	0	1.732	0.003393	0.3233		CC	membrane part	Abca1, Abcg1, Apoe, Bst1, C5ar1, Cd1d1, Cd2, Cd22, Cd28, Cd36, [...]	29	109	26.61	2.9	7.758	0.0001328	0.03373
	BP	cellular response to oxygen radical	Cd36, Mpo, Tnf	3	3	100	0	1.732	0.003393	0.3233		CC	immunological synapse	Cd28, Cd37, Cd3e, Cd53, Cd6, Icam1, Lck, Lgals3, Havcr2	9	15	60	7.76	1.807	0.0001899	0.03859
	BP	cellular detoxification	Cd36, Mpo, Tnf	3	3	100	0	1.732	0.003393	0.3233		BP	organophosphate ester transport	Abca1, Abcg1, Apoe, Prkcd	4	4	100	0	2	0.0007777	0.1183
	BP	monocyte chemotaxis	Lgals3, Ccl21a, Ccl17, Ccl22, Ccl5, Ccl6, Ccl8, Ccl9, Tnfsf11, Ccl19	9	23	39.13	3.83	2.085	0.0039	0.3233		CC	alpha-beta T cell receptor complex	Cd3d, Cd3e, Cd3g, Cd247	4	4	100	0	2	0.000815	0.1183
	BP	neutrophil chemotaxis	C5ar1, Csf3r, Ifng, Lgals3, Ccl21a, Ccl17, Ccl22, Ccl5, Ccl6, Ccl8, [...]	12	36	33.33	3.04	2.5	0.003978	0.3233		BP	T cell aggregation	Cd1d1, Cd2, Cd28, Cd3d, Cd3e, Cd48, Cd5, Cd6, Cd80, Cd8a, [...]	37	141	26.24	2.07	3.453	0.001153	0.1464
	BP	anion transport	Apoe, Cd36, Il1rn, Nos2, Slc11a1, Prkcd, Syk, Tnf, Tnfsf11	6	12	50	5.96	2.598	0.004198	0.3233		BP	cell recognition	Cd36, Cd6, Lgals3, Prf1, Ccl21a, Ccl19, Havcr2, Tigit	7	13	53.85	6.03	2.219	0.002338	0.2627
	BP	chemokine-mediated signaling pathway	Ccl21a, Ccl17, Ccl22, Ccl5, Ccl6, Ccl8, Ccl9, Cxcl5, Ccl19, Ppbp, [...]	11	32	34.38	3.17	2.121	0.004355	0.3233		BP	leukocyte aggregation	Cd1d1, Cd2, Cd28, Cd3d, Cd3e, Cd48, Cd5, Cd6, Cd80, Cd8a, [...]	42	174	24.14	1.85	3.108	0.003167	0.2627
	BP	regulation of insulin secretion	Cd38, Ifng, Nos2, Ccl5, Tnf	4	6	66.67	11.58	2.041	0.005879	0.3233		BP	positive regulation of reactive oxygen species met...	Cd36, Cdkn1a, F2rl1, Icam1, Ifng, Itgb2, Prkcd, Plau, Thbs1, Tlr4, [...]	11	28	39.29	3.43	2.457	0.003177	0.2627
	MF	chemokine activity	Ccl21a, Ccl17, Ccl22, Ccl5, Ccl6, Ccl8, Ccl9, Cxcl5, Ccl19, Ppbp, [...]	11	35	31.43	2.75	1.859	0.009636	0.3233		BP	immunological synapse formation	Cd6, Lgals3, Prf1, Ccl21a, Ccl19, Havcr2	4	5	80	20.66	2.683	0.003208	0.2627
	BP	positive regulation of myoblast fusion	Cd53, Il4, Nfatc2, Ccl8, Tnfsf14	5	10	50	5.82	1.265	0.009767	0.3233		BP	lipid localization	Abca1, Abcg1, Apoe, C3, Cd36, Nos2, Prkcd, Syk, Thbs1, Tnf, [...]	11	28	39.29	3.4	2.079	0.003362	0.2627
	BP	regulation of lymphocyte activation	Bst1, Cd38, Cd3e, Cd5, Cd80, Cdkn1a, Ido1, Ifng, Il12a, Il4, [...]	7	18	38.89	3.89	7.071	0.009768	0.3233		BP	positive regulation of interferon-gamma production	Cd1d1, Cd2, Cd3e, Il12rb2, Il18r1, Il2, Slc11a1, Tlr4, Tnf, Tnfsf4, [...]	12	33	36.36	3.05	2.785	0.004231	0.2811
	BP	reactive nitrogen species metabolic process	Icam1, Ifng, Il4, Nos2, Rora, Tlr4, Tnf, Klrk1, Tlr5	9	26	34.62	3.14	1.765	0.009936	0.3233		MF	cholesterol transporter activity	Abca1, Abcg1, Apoe	3	3	100	0	1.732	0.004573	0.2811
	BP	peptide secretion	Abca1, Cd38, Ifng, Il1rn, Nos2, Ccl5, Tnf, Tnfsf11	6	14	42.86	4.4	2.138	0.01111	0.3233		BP	nitric oxide mediated signal transduction	Apoe, Cd36, Nos2, Thbs1	3	3	100	0	2.309	0.004611	0.2811
	BP	defense response to Gram-negative bacterium	Mr1, Lyz2, Slc11a1, Cxcl5, Tlr4, Tlr5, Cd160	7	18	38.89	3.73	1.65	0.01143	0.3233		BP	reverse cholesterol transport	Abca1, Abcg1, Apoe	3	3	100	0	1.732	0.004704	0.2811
	BP	nitric oxide mediated signal transduction	Apoe, Cd36, Nos2	3	4	75	17.24	1.5	0.01206	0.3233		BP	anion transport	Apoe, Cd36, Il1rn, Nos2, Slc11a1, Prkcd, Syk, Thbs1, Tnf, Tnfsf11	6	12	50	5.25	2.887	0.007168	0.319
	BP	organophosphate ester transport	Abca1, Apoe, Prkcd	3	4	75	17.24	1.5	0.01206	0.3233		BP	positive regulation of macrophage chemotaxis	C5ar1, Cmklr1, Ccl21a, Ccl5, Thbs1, Slamf1	6	12	50	5.12	1.732	0.007895	0.319
	BP	regulation of cyclic nucleotide biosynthetic proce...	Abca1, Apoe, Nos2	3	4	75	17.24	1.5	0.01206	0.3233		BP	regulation of insulin secretion	Cd38, Ifng, Nos2, Ccl5, Tnf	4	6	66.67	10.13	2.041	0.008853	0.319

## Sheet: Day 17 down genes pathways
OP versus vehicle day 17 - downregulated genes											TOP versus vehicle day 17 - downregulated genes
Kegg pathway enrichment											Kegg pathway enrichment
Name	Significant genes	S	N	S/N (%)	OR	Z-score	P	P (adj.)			Name	Significant genes	S	N	S/N (%)	OR	Z-score	P	P (adj.)
MAPK signaling pathway	Atf2, Dusp6, Ecsit, Il1r1, Map2k1, Map3k1, Mapk1, Mapk11, Mapk3, Mapk8, [...]	19	54	35.19	3.25	-2.586	0.000252	0.03957			Signaling pathways regulating pluripotency of stem...	Bmi1, Igf1r, Il6st, Jak1, Lif, Map2k1, Mapk1, Mapk11, Mapk3, Myc, [...]	13	21	61.9	8.75	-2.837	3.62e-06	0.000463
Pancreatic cancer	Map2k1, Mapk1, Mapk3, Mapk8, Nfkb1, Rela, Smad3, Stat3, Tgfb2, Tgfb3, [...]	12	29	41.38	4.04	-2.228	0.0007657	0.04855			Pathways in cancer	Birc5, Casp3, Crebbp, Cxcr4, Fadd, Fn1, Igf1r, Il6, Itga6, Itgb1, [...]	29	79	36.71	3.44	-3.263	5.824e-06	0.000463
Cellular senescence	H2-K1, H2-M3, Map2k1, Mapk1, Mapk11, Mapk3, Mapkapk2, Myc, Nfkb1, Rela, [...]	14	39	35.9	3.23	-2.242	0.001479	0.04855			MAPK signaling pathway	Atf2, Casp3, Dusp6, Ecsit, Il1b, Il1r1, Il1r2, Map2k1, Mapk1, Mapk11, [...]	22	54	40.74	3.9	-2.994	1.476e-05	0.0007825
FoxO signaling pathway	Atg12, Il10, Map2k1, Mapk1, Mapk11, Mapk3, Mapk8, Smad3, Stat3, Tgfb2, [...]	13	35	37.14	3.39	-2.197	0.001541	0.04855			FoxO signaling pathway	Atg12, Crebbp, Igf1r, Il6, Map2k1, Mapk1, Mapk11, Mapk3, Mapk8, Smad3, [...]	16	35	45.71	4.58	-2.704	4.823e-05	0.001911
Colorectal cancer	Birc5, Map2k1, Mapk1, Mapk3, Mapk8, Myc, Smad3, Tgfb2, Tgfb3, Tgfbr1	10	24	41.67	4.02	-2.041	0.002069	0.04855			Hepatitis B	Atf2, Birc5, Casp3, Creb1, Crebbp, Ddx58, Egr2, Fadd, Ifnar1, Il6, [...]	26	75	34.67	3.04	-3.002	6.829e-05	0.001911
Relaxin signaling pathway	Atf2, Map2k1, Mapk1, Mapk11, Mapk3, Mapk8, Mmp9, Nfkb1, Rela, Smad3, [...]	12	32	37.5	3.41	-2.121	0.002161	0.04855			Pancreatic cancer	Jak1, Map2k1, Mapk1, Mapk3, Mapk8, Nfkb1, Rela, Smad3, Smad4, Stat3, [...]	14	29	48.28	5.01	-2.6	7.213e-05	0.001911
Chronic myeloid leukemia	Abl1, Map2k1, Mapk1, Mapk3, Myc, Nfkb1, Rela, Smad3, Tgfb2, Tgfb3, [...]	11	28	39.29	3.66	-2.079	0.002165	0.04855			Colorectal cancer	Birc5, Casp3, Map2k1, Mapk1, Mapk3, Mapk8, Myc, Smad3, Smad4, Tgfb2, [...]	12	24	50	5.29	-2.449	0.0001648	0.003743
Signaling pathways regulating pluripotency of stem...	Il6st, Jak3, Map2k1, Mapk1, Mapk11, Mapk3, Myc, Smad3, Stat3	9	21	42.86	4.19	-1.964	0.002792	0.05033			AGE-RAGE signaling pathway in diabetic complicatio...	Casp3, Ccl12, Fn1, Il1b, Il6, Mapk1, Mapk11, Mapk3, Mapk8, Nfkb1, [...]	18	47	38.3	3.38	-2.626	0.0002684	0.004851
Neurotrophin signaling pathway	Abl1, Irak1, Map2k1, Map3k1, Mapk1, Mapk11, Mapk3, Mapk8, Mapkapk2, Nfkb1, [...]	12	33	36.36	3.24	-2.089	0.002939	0.05033			HIF-1 signaling pathway	Crebbp, Igf1r, Il6, Ltbr, Map2k1, Mapk1, Mapk3, Nfkb1, Rela, Rps6, [...]	14	32	43.75	4.15	-2.475	0.0002746	0.004851
Pathways in cancer	Abl1, Birc5, Csf1r, Cxcr4, Fadd, Itgb1, Map2k1, Mapk1, Mapk3, Mapk8, [...]	22	79	27.85	2.29	-2.475	0.003206	0.05033			TGF-beta signaling pathway	Crebbp, Mapk1, Mapk3, Myc, Smad3, Smad4, Tgfb2, Tgfb3, Tgfbr1	9	16	56.25	6.66	-2.25	0.0003818	0.00607
OP versus vehicle day 17 - downregulated genes											TOP versus vehicle day 17 - downregulated genes
GO enrichment											GO enrichment
Ontology	Name	Significant genes	S	N	S/N (%)	OR	Z-score	P	P (adj.)		Ontology	Name	Significant genes	S	N	S/N (%)	OR	Z-score	P	P (adj.)
BP	single-organism organelle organization	Abl1, Atg5, Birc5, Atf2, Csf1r, Hck, Hdac3, Itgb1, Anxa1, Smad3, [...]	20	54	37.04	3.46	-3.402	8.701e-05	0.0721		CC	integral component of membrane	Abca1, Abcg1, C5ar1, Cd1d1, Cd2, Cd22, Cd28, Cd36, Cd37, Cd38, [...]	55	210	26.19	2.36	4.623	4.432e-05	0.03009
BP	Bergmann glial cell differentiation	Abl1, Vim, Map2k1, Mapk1, Mapk3	5	5	100	0	-2.236	0.0001131	0.0721		BP	T cell costimulation	Cd28, Cd3e, Cd5, Cd80, Ccl21a, Tnfsf4, Ccl19, Tnfsf14, Icos, Cd274	9	14	64.29	9.54	2.673	7.691e-05	0.03009
BP	posttranscriptional regulation of gene expression	Eif2b4, Ilf3, Mapkapk2, Myd88, Nfkb1, Stat3, Vegfa, Map2k1, Mapk1, Mapk3, [...]	12	25	48	5.08	-2.4	0.0001844	0.07838		CC	external side of plasma membrane	Abca1, Abcg1, Apoe, Cd1d1, Cd2, Cd22, Cd28, Cd36, Cd3e, Cd48, [...]	41	145	28.28	2.37	3.239	8.886e-05	0.03009
CC	nucleus	Abl1, Birc5, Atf2, Bcl10, Runx3, Egr2, Fadd, Hck, Hdac3, Hmgb1, [...]	53	225	23.56	2.03	-3.867	0.0004566	0.1197		CC	membrane part	Abca1, Abcg1, Apoe, Bst1, C5ar1, Cd1d1, Cd2, Cd22, Cd28, Cd36, [...]	29	109	26.61	2.9	7.758	0.0001328	0.03373
CC	intracellular ribonucleoprotein complex	Ilf3, Psma2, Rpl19, Rps6, Smn1, Tubb5, Sf3a3, Ythdf2, Abcf1, Edc3	7	11	63.64	9.53	-2.714	0.0004692	0.1197		CC	immunological synapse	Cd28, Cd37, Cd3e, Cd53, Cd6, Icam1, Lck, Lgals3, Havcr2	9	15	60	7.76	1.807	0.0001899	0.03859
BP	actomyosin structure organization	Itgb1, Smad3, Pdgfrb, Tgfb3, Tgfbr1	4	4	100	0	-2.5	0.0006942	0.1293		BP	organophosphate ester transport	Abca1, Abcg1, Apoe, Prkcd	4	4	100	0	2	0.0007777	0.1183
CC	macromolecular complex	Atg5, Birc5, Bcl10, C1qb, Runx3, Cd63, Cr2, Csf1r, Eif2b4, Fadd, [...]	8	16	50	6.37	-13.5	0.0007279	0.1293		CC	alpha-beta T cell receptor complex	Cd3d, Cd3e, Cd3g, Cd247	4	4	100	0	2	0.000815	0.1183
BP	negative regulation of apoptotic process	Abl1, Atg5, Birc5, Bcl10, Csf1r, Cx3cr1, Fadd, Hck, Il10, Il7, [...]	25	86	29.07	2.45	-3.882	0.0009028	0.1293		BP	T cell aggregation	Cd1d1, Cd2, Cd28, Cd3d, Cd3e, Cd48, Cd5, Cd6, Cd80, Cd8a, [...]	37	141	26.24	2.07	3.453	0.001153	0.1464
CC	supramolecular polymer	Birc5, Bcl10, Hck, Hdac3, Inpp5d, Nefl, Tubb5, Vim, Map2k1, Map3k1, [...]	11	25	44	4.25	-2.2	0.0009307	0.1293		BP	cell recognition	Cd36, Cd6, Lgals3, Prf1, Ccl21a, Ccl19, Havcr2, Tigit	7	13	53.85	6.03	2.219	0.002338	0.2627
CC	membrane-enclosed lumen	Abl1, Birc5, Atf2, Runx3, Cd4, Cd63, Hdac3, Ilf3, Irf2, Anxa1, [...]	31	113	27.43	2.2	-2.916	0.001014	0.1293		BP	leukocyte aggregation	Cd1d1, Cd2, Cd28, Cd3d, Cd3e, Cd48, Cd5, Cd6, Cd80, Cd8a, [...]	42	174	24.14	1.85	3.108	0.003167	0.2627
MF	protein heterodimerization activity	Atf2, Bcl10, H2-K1, Il12b, Irak1, Il6st, Itgb1, Smad3, Myc, Nfkb1, [...]	23	76	30.26	2.46	-2.638	0.001228	0.1422		BP	positive regulation of reactive oxygen species met...	Cd36, Cdkn1a, F2rl1, Icam1, Ifng, Itgb2, Prkcd, Plau, Thbs1, Tlr4, [...]	11	28	39.29	3.43	2.457	0.003177	0.2627
BP	neurogenesis	Abl1, Runx3, Cxcr4, Csf1r, Cx3cr1, Egr2, Eif2b4, H2-K1, Il1r1, Il6st, [...]	15	45	33.33	3.03	-5.068	0.001556	0.1422		BP	immunological synapse formation	Cd6, Lgals3, Prf1, Ccl21a, Ccl19, Havcr2	4	5	80	20.66	2.683	0.003208	0.2627
BP	system development	Abl1, Atg5, Atf2, Bcl10, C1qb, Runx3, Cd4, Cd83, Cxcr4, Cr2, [...]	9	23	39.13	4.57	-15.847	0.001737	0.1422		BP	lipid localization	Abca1, Abcg1, Apoe, C3, Cd36, Nos2, Prkcd, Syk, Thbs1, Tnf, [...]	11	28	39.29	3.4	2.079	0.003362	0.2627
MF	chromatin DNA binding	Hdac3, Smad3, Notch1, Rela, Stat3	5	7	71.43	13.08	-1.89	0.001842	0.1422		BP	positive regulation of interferon-gamma production	Cd1d1, Cd2, Cd3e, Il12rb2, Il18r1, Il2, Slc11a1, Tlr4, Tnf, Tnfsf4, [...]	12	33	36.36	3.05	2.785	0.004231	0.2811
CC	intracellular organelle lumen	Abl1, Birc5, Atf2, Runx3, Cd4, Cd63, Hdac3, Ilf3, Irf2, Anxa1, [...]	29	108	26.85	2.14	-2.983	0.001904	0.1422		MF	cholesterol transporter activity	Abca1, Abcg1, Apoe	3	3	100	0	1.732	0.004573	0.2811
BP	negative regulation of cell death	Abl1, Atg5, Birc5, Bcl10, Csf1r, Cx3cr1, Fadd, Hck, Il10, Il7, [...]	30	115	26.09	2.09	-3.45	0.002271	0.1422		BP	nitric oxide mediated signal transduction	Apoe, Cd36, Nos2, Thbs1	3	3	100	0	2.309	0.004611	0.2811
CC	nucleoplasm	Abl1, Atf2, Hdac3, Ilf3, Irf2, Anxa1, Smad3, Mapkapk2, Mif, Myc, [...]	22	75	29.33	2.33	-2.54	0.002494	0.1422		BP	reverse cholesterol transport	Abca1, Abcg1, Apoe	3	3	100	0	1.732	0.004704	0.2811
MF	heterocyclic compound binding	Abl1, Atf2, Runx3, Cr2, Csf1r, Egr2, Eif2b4, H2-K1, Hck, Hdac3, [...]	32	131	24.43	2.05	-4.456	0.002649	0.1422		BP	anion transport	Apoe, Cd36, Il1rn, Nos2, Slc11a1, Prkcd, Syk, Thbs1, Tnf, Tnfsf11	6	12	50	5.25	2.887	0.007168	0.319
BP	regulation of transmembrane receptor protein serin...	Abl1, Smad3, Notch1, Tgfb2, Tgfb3, Tgfbr1	4	5	80	21.02	-2.683	0.003041	0.1422		BP	positive regulation of macrophage chemotaxis	C5ar1, Cmklr1, Ccl21a, Ccl5, Thbs1, Slamf1	6	12	50	5.12	1.732	0.007895	0.319
BP	thyroid gland development	Smad3, Map2k1, Mapk1, Mapk3	4	5	80	20.93	-1.789	0.003077	0.1422		BP	regulation of insulin secretion	Cd38, Ifng, Nos2, Ccl5, Tnf	4	6	66.67	10.13	2.041	0.008853	0.319
